# Supplementary material for: Patients experiencing statin-induced myalgia exhibit a unique program of skeletal muscle gene expression following statin re-challenge
Source: PubMed Central journal article supplement (PMC5542661; doi:10.1371/journal.pone.0181308), 2017-08-03
Supplement: pone.0181308.s003.pdf [file pone.0181308.s003.pdf]

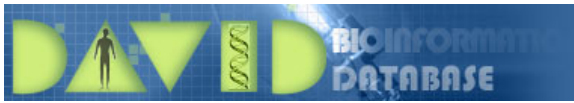

**\*\*\* Announcing DAVID 6.8 Beta with updated Knowledgebase ([more info](#)). You may explore the new version at [david.ncicrf.gov](http://david.ncicrf.gov). \*\*\* DAVID 6.8 will become the production version on October 17, 2016 at this URL. DAVID 6.7 will be available on our development site until at least January 15, 2017. \*\*\***

## Functional Annotation Clustering

[Help and Manual](#)

Current Gene List: **List\_1**

Current Background: **Homo sapiens**

391 DAVID IDs

Options Classification Stringency **High**

### 118 Cluster(s)

[Download File](#)

|                          | Annotation Cluster   | Enrichment Score                                                             |           |  | Count | P_Value | Benjamini | FDR    |
|--------------------------|----------------------|------------------------------------------------------------------------------|-----------|--|-------|---------|-----------|--------|
| <input type="checkbox"/> | Annotation Cluster 1 | 6.89                                                                         | <b>G</b>  |  |       |         |           |        |
| <input type="checkbox"/> | GOTERM_BP_FAT        | <a href="#">proteolysis involved in cellular protein catabolic process</a>   | <b>RT</b> |  | 37    | 1.1E-8  | 1.8E-5    | 1.9E-5 |
| <input type="checkbox"/> | GOTERM_BP_FAT        | <a href="#">cellular protein catabolic process</a>                           | <b>RT</b> |  | 37    | 1.3E-8  | 1.0E-5    | 2.2E-5 |
| <input type="checkbox"/> | GOTERM_BP_FAT        | <a href="#">protein catabolic process</a>                                    | <b>RT</b> |  | 37    | 2.9E-8  | 1.5E-5    | 4.8E-5 |
| <input type="checkbox"/> | GOTERM_BP_FAT        | <a href="#">modification-dependent protein catabolic process</a>             | <b>RT</b> |  | 35    | 4.1E-8  | 1.6E-5    | 6.9E-5 |
| <input type="checkbox"/> | GOTERM_BP_FAT        | <a href="#">modification-dependent macromolecule catabolic process</a>       | <b>RT</b> |  | 35    | 4.1E-8  | 1.6E-5    | 6.9E-5 |
| <input type="checkbox"/> | SP_PIR_KEYWORDS      | <a href="#">ubl conjugation pathway</a>                                      | <b>RT</b> |  | 31    | 1.0E-7  | 1.2E-5    | 1.4E-4 |
| <input type="checkbox"/> | GOTERM_BP_FAT        | <a href="#">cellular macromolecule catabolic process</a>                     | <b>RT</b> |  | 39    | 1.6E-7  | 5.0E-5    | 2.6E-4 |
| <input type="checkbox"/> | GOTERM_BP_FAT        | <a href="#">macromolecule catabolic process</a>                              | <b>RT</b> |  | 39    | 9.8E-7  | 2.6E-4    | 1.6E-3 |
| <input type="checkbox"/> | GOTERM_BP_FAT        | <a href="#">proteolysis</a>                                                  | <b>RT</b> |  | 42    | 8.0E-5  | 1.8E-2    | 1.3E-1 |
| <input type="checkbox"/> | Annotation Cluster 2 | 3.98                                                                         | <b>G</b>  |  |       |         |           |        |
| <input type="checkbox"/> | GOTERM_MF_FAT        | <a href="#">small conjugating protein ligase activity</a>                    | <b>RT</b> |  | 14    | 2.6E-5  | 1.2E-2    | 3.7E-2 |
| <input type="checkbox"/> | GOTERM_MF_FAT        | <a href="#">ubiquitin-protein ligase activity</a>                            | <b>RT</b> |  | 13    | 3.5E-5  | 8.4E-3    | 5.0E-2 |
| <input type="checkbox"/> | GOTERM_MF_FAT        | <a href="#">acid-amino acid ligase activity</a>                              | <b>RT</b> |  | 14    | 1.8E-4  | 2.9E-2    | 2.6E-1 |
| <input type="checkbox"/> | GOTERM_MF_FAT        | <a href="#">ligase activity, forming carbon-nitrogen bonds</a>               | <b>RT</b> |  | 14    | 7.0E-4  | 6.5E-2    | 1.0E0  |
| <input type="checkbox"/> | Annotation Cluster 3 | 3.91                                                                         | <b>G</b>  |  |       |         |           |        |
| <input type="checkbox"/> | GOTERM_CC_FAT        | <a href="#">nuclear lumen</a>                                                | <b>RT</b> |  | 51    | 1.5E-5  | 4.5E-3    | 2.0E-2 |
| <input type="checkbox"/> | GOTERM_CC_FAT        | <a href="#">organelle lumen</a>                                              | <b>RT</b> |  | 56    | 2.0E-4  | 2.0E-2    | 2.7E-1 |
| <input type="checkbox"/> | GOTERM_CC_FAT        | <a href="#">intracellular organelle lumen</a>                                | <b>RT</b> |  | 55    | 2.1E-4  | 1.6E-2    | 2.8E-1 |
| <input type="checkbox"/> | GOTERM_CC_FAT        | <a href="#">membrane-enclosed lumen</a>                                      | <b>RT</b> |  | 56    | 3.4E-4  | 2.0E-2    | 4.5E-1 |
| <input type="checkbox"/> | Annotation Cluster 4 | 2.93                                                                         | <b>G</b>  |  |       |         |           |        |
| <input type="checkbox"/> | GOTERM_MF_FAT        | <a href="#">metal ion binding</a>                                            | <b>RT</b> |  | 107   | 8.9E-4  | 6.9E-2    | 1.3E0  |
| <input type="checkbox"/> | GOTERM_MF_FAT        | <a href="#">cation binding</a>                                               | <b>RT</b> |  | 107   | 1.3E-3  | 7.3E-2    | 1.8E0  |
| <input type="checkbox"/> | GOTERM_MF_FAT        | <a href="#">ion binding</a>                                                  | <b>RT</b> |  | 108   | 1.4E-3  | 7.4E-2    | 2.1E0  |
| <input type="checkbox"/> | Annotation Cluster 5 | 2.77                                                                         | <b>G</b>  |  |       |         |           |        |
| <input type="checkbox"/> | GOTERM_CC_FAT        | <a href="#">myofibril</a>                                                    | <b>RT</b> |  | 9     | 1.2E-3  | 5.7E-2    | 1.6E0  |
| <input type="checkbox"/> | GOTERM_CC_FAT        | <a href="#">contractile fiber part</a>                                       | <b>RT</b> |  | 9     | 1.3E-3  | 5.5E-2    | 1.8E0  |
| <input type="checkbox"/> | GOTERM_CC_FAT        | <a href="#">contractile fiber</a>                                            | <b>RT</b> |  | 9     | 2.1E-3  | 7.4E-2    | 2.7E0  |
| <input type="checkbox"/> | GOTERM_CC_FAT        | <a href="#">sarcomere</a>                                                    | <b>RT</b> |  | 8     | 2.5E-3  | 8.0E-2    | 3.3E0  |
| <input type="checkbox"/> | Annotation Cluster 6 | 2.74                                                                         | <b>G</b>  |  |       |         |           |        |
| <input type="checkbox"/> | SP_PIR_KEYWORDS      | <a href="#">zinc-finger</a>                                                  | <b>RT</b> |  | 54    | 7.1E-4  | 4.2E-2    | 9.7E-1 |
| <input type="checkbox"/> | GOTERM_MF_FAT        | <a href="#">transition metal ion binding</a>                                 | <b>RT</b> |  | 77    | 1.3E-3  | 8.2E-2    | 1.8E0  |
| <input type="checkbox"/> | SP_PIR_KEYWORDS      | <a href="#">zinc</a>                                                         | <b>RT</b> |  | 63    | 2.1E-3  | 7.2E-2    | 2.8E0  |
| <input type="checkbox"/> | GOTERM_MF_FAT        | <a href="#">zinc ion binding</a>                                             | <b>RT</b> |  | 63    | 6.0E-3  | 2.1E-1    | 8.3E0  |
| <input type="checkbox"/> | Annotation Cluster 7 | 2.27                                                                         | <b>G</b>  |  |       |         |           |        |
| <input type="checkbox"/> | GOTERM_BP_FAT        | <a href="#">protein ubiquitination</a>                                       | <b>RT</b> |  | 9     | 3.5E-3  | 5.0E-1    | 5.7E0  |
| <input type="checkbox"/> | GOTERM_BP_FAT        | <a href="#">protein modification by small protein conjugation or removal</a> | <b>RT</b> |  | 10    | 6.5E-3  | 6.9E-1    | 1.0E1  |
| <input type="checkbox"/> | GOTERM_BP_FAT        | <a href="#">protein modification by small protein conjugation</a>            | <b>RT</b> |  | 9     | 6.6E-3  | 6.5E-1    | 1.0E1  |
| <input type="checkbox"/> | Annotation Cluster 8 | 2.1                                                                          | <b>G</b>  |  |       |         |           |        |

|                          | Annotation Cluster    | Enrichment Score                                               |                    |  | Count | P_Value | Benjamini | FDR   |
|--------------------------|-----------------------|----------------------------------------------------------------|--------------------|--|-------|---------|-----------|-------|
| <input type="checkbox"/> | Annotation Cluster 1  | 6.89                                                           | <b>G</b>           |  |       |         |           |       |
| <input type="checkbox"/> | UP_SEQ_FEATURE        | domain:SOCS box                                                | <a href="#">RT</a> |  | 5     | 6.6E-3  | 8.7E-1    | 1.0E1 |
| <input type="checkbox"/> | INTERPRO              | <a href="#">SOCS protein, C-terminal</a>                       | <a href="#">RT</a> |  | 5     | 7.1E-3  | 9.9E-1    | 1.0E1 |
| <input type="checkbox"/> | SMART                 | <a href="#">SOCS</a>                                           | <a href="#">RT</a> |  | 5     | 1.1E-2  | 8.2E-1    | 1.2E1 |
| <input type="checkbox"/> | Annotation Cluster 9  | 1.93                                                           | <b>G</b>           |  |       |         |           |       |
| <input type="checkbox"/> | GOTERM_CC_FAT         | <a href="#">mitochondrial outer membrane</a>                   | <a href="#">RT</a> |  | 7     | 7.0E-3  | 1.6E-1    | 9.0E0 |
| <input type="checkbox"/> | GOTERM_CC_FAT         | <a href="#">organelle outer membrane</a>                       | <a href="#">RT</a> |  | 7     | 1.4E-2  | 2.2E-1    | 1.7E1 |
| <input type="checkbox"/> | GOTERM_CC_FAT         | <a href="#">outer membrane</a>                                 | <a href="#">RT</a> |  | 7     | 1.6E-2  | 2.1E-1    | 2.0E1 |
| <input type="checkbox"/> | Annotation Cluster 10 | 1.8                                                            | <b>G</b>           |  |       |         |           |       |
| <input type="checkbox"/> | INTERPRO              | <a href="#">Cyclin-like F-box</a>                              | <a href="#">RT</a> |  | 6     | 1.4E-2  | 9.0E-1    | 1.9E1 |
| <input type="checkbox"/> | UP_SEQ_FEATURE        | domain:F-box                                                   | <a href="#">RT</a> |  | 6     | 1.4E-2  | 9.2E-1    | 2.1E1 |
| <input type="checkbox"/> | SMART                 | <a href="#">FBOX</a>                                           | <a href="#">RT</a> |  | 6     | 2.0E-2  | 6.7E-1    | 2.2E1 |
| <input type="checkbox"/> | Annotation Cluster 11 | 1.78                                                           | <b>G</b>           |  |       |         |           |       |
| <input type="checkbox"/> | SP_PIR_KEYWORDS       | <a href="#">ank repeat</a>                                     | <a href="#">RT</a> |  | 12    | 8.3E-3  | 2.1E-1    | 1.1E1 |
| <input type="checkbox"/> | INTERPRO              | <a href="#">Ankyrin</a>                                        | <a href="#">RT</a> |  | 12    | 9.5E-3  | 9.6E-1    | 1.3E1 |
| <input type="checkbox"/> | UP_SEQ_FEATURE        | repeat:ANK 1                                                   | <a href="#">RT</a> |  | 11    | 1.7E-2  | 9.1E-1    | 2.5E1 |
| <input type="checkbox"/> | UP_SEQ_FEATURE        | repeat:ANK 2                                                   | <a href="#">RT</a> |  | 11    | 1.8E-2  | 8.9E-1    | 2.5E1 |
| <input type="checkbox"/> | SMART                 | <a href="#">ANK</a>                                            | <a href="#">RT</a> |  | 12    | 2.0E-2  | 8.1E-1    | 2.2E1 |
| <input type="checkbox"/> | UP_SEQ_FEATURE        | repeat:ANK 3                                                   | <a href="#">RT</a> |  | 9     | 4.0E-2  | 9.5E-1    | 4.8E1 |
| <input type="checkbox"/> | Annotation Cluster 12 | 1.75                                                           | <b>G</b>           |  |       |         |           |       |
| <input type="checkbox"/> | GOTERM_CC_FAT         | <a href="#">sarcoplasmic reticulum membrane</a>                | <a href="#">RT</a> |  | 4     | 3.7E-3  | 9.6E-2    | 4.8E0 |
| <input type="checkbox"/> | GOTERM_CC_FAT         | <a href="#">sarcoplasmic reticulum</a>                         | <a href="#">RT</a> |  | 4     | 3.7E-2  | 3.2E-1    | 3.9E1 |
| <input type="checkbox"/> | GOTERM_CC_FAT         | <a href="#">sarcoplasm</a>                                     | <a href="#">RT</a> |  | 4     | 4.2E-2  | 3.5E-1    | 4.3E1 |
| <input type="checkbox"/> | Annotation Cluster 13 | 1.7                                                            | <b>G</b>           |  |       |         |           |       |
| <input type="checkbox"/> | GOTERM_BP_FAT         | <a href="#">regulation of apoptosis</a>                        | <a href="#">RT</a> |  | 27    | 1.8E-2  | 8.8E-1    | 2.6E1 |
| <input type="checkbox"/> | GOTERM_BP_FAT         | <a href="#">regulation of programmed cell death</a>            | <a href="#">RT</a> |  | 27    | 2.0E-2  | 8.7E-1    | 2.9E1 |
| <input type="checkbox"/> | GOTERM_BP_FAT         | <a href="#">regulation of cell death</a>                       | <a href="#">RT</a> |  | 27    | 2.1E-2  | 8.6E-1    | 3.0E1 |
| <input type="checkbox"/> | Annotation Cluster 14 | 1.68                                                           | <b>G</b>           |  |       |         |           |       |
| <input type="checkbox"/> | GOTERM_BP_FAT         | <a href="#">telomere maintenance</a>                           | <a href="#">RT</a> |  | 4     | 2.0E-2  | 8.9E-1    | 2.9E1 |
| <input type="checkbox"/> | KEGG_PATHWAY          | <a href="#">Non-homologous end-joining</a>                     | <a href="#">RT</a> |  | 3     | 2.1E-2  | 7.0E-1    | 2.1E1 |
| <input type="checkbox"/> | GOTERM_BP_FAT         | <a href="#">telomere organization</a>                          | <a href="#">RT</a> |  | 4     | 2.2E-2  | 8.6E-1    | 3.1E1 |
| <input type="checkbox"/> | Annotation Cluster 15 | 1.62                                                           | <b>G</b>           |  |       |         |           |       |
| <input type="checkbox"/> | UP_SEQ_FEATURE        | zinc finger region:RING-type                                   | <a href="#">RT</a> |  | 11    | 9.4E-3  | 9.0E-1    | 1.4E1 |
| <input type="checkbox"/> | INTERPRO              | <a href="#">Zinc finger, RING-type, conserved site</a>         | <a href="#">RT</a> |  | 13    | 1.2E-2  | 9.3E-1    | 1.7E1 |
| <input type="checkbox"/> | INTERPRO              | <a href="#">Zinc finger, RING-type</a>                         | <a href="#">RT</a> |  | 12    | 4.0E-2  | 9.6E-1    | 4.5E1 |
| <input type="checkbox"/> | SMART                 | <a href="#">RING</a>                                           | <a href="#">RT</a> |  | 12    | 7.6E-2  | 8.4E-1    | 6.2E1 |
| <input type="checkbox"/> | Annotation Cluster 16 | 1.61                                                           | <b>G</b>           |  |       |         |           |       |
| <input type="checkbox"/> | GOTERM_CC_FAT         | <a href="#">integrator complex</a>                             | <a href="#">RT</a> |  | 3     | 2.4E-2  | 2.5E-1    | 2.8E1 |
| <input type="checkbox"/> | GOTERM_BP_FAT         | <a href="#">snRNA processing</a>                               | <a href="#">RT</a> |  | 3     | 2.5E-2  | 8.5E-1    | 3.5E1 |
| <input type="checkbox"/> | GOTERM_BP_FAT         | <a href="#">snRNA metabolic process</a>                        | <a href="#">RT</a> |  | 3     | 2.5E-2  | 8.5E-1    | 3.5E1 |
| <input type="checkbox"/> | Annotation Cluster 17 | 1.57                                                           | <b>G</b>           |  |       |         |           |       |
| <input type="checkbox"/> | GOTERM_CC_FAT         | <a href="#">endoplasmic reticulum part</a>                     | <a href="#">RT</a> |  | 14    | 1.5E-2  | 2.1E-1    | 1.8E1 |
| <input type="checkbox"/> | GOTERM_CC_FAT         | <a href="#">endoplasmic reticulum membrane</a>                 | <a href="#">RT</a> |  | 11    | 3.2E-2  | 2.9E-1    | 3.5E1 |
| <input type="checkbox"/> | GOTERM_CC_FAT         | <a href="#">nuclear envelope-endoplasmic reticulum network</a> | <a href="#">RT</a> |  | 11    | 4.3E-2  | 3.5E-1    | 4.4E1 |
| <input type="checkbox"/> | Annotation Cluster 18 | 1.49                                                           | <b>G</b>           |  |       |         |           |       |
| <input type="checkbox"/> | UP_SEQ_FEATURE        | repeat:MORN 4                                                  | <a href="#">RT</a> |  | 3     | 1.9E-2  | 8.6E-1    | 2.7E1 |
| <input type="checkbox"/> | UP_SEQ_FEATURE        | repeat:MORN 3                                                  | <a href="#">RT</a> |  | 3     | 3.0E-2  | 9.2E-1    | 3.9E1 |
| <input type="checkbox"/> | UP_SEQ_FEATURE        | repeat:MORN 2                                                  | <a href="#">RT</a> |  | 3     | 3.5E-2  | 9.3E-1    | 4.4E1 |
| <input type="checkbox"/> | UP_SEQ_FEATURE        | repeat:MORN 1                                                  | <a href="#">RT</a> |  | 3     | 3.5E-2  | 9.3E-1    | 4.4E1 |
| <input type="checkbox"/> | INTERPRO              | <a href="#">MORN motif</a>                                     | <a href="#">RT</a> |  | 3     | 3.6E-2  | 9.7E-1    | 4.2E1 |
| <input type="checkbox"/> | SMART                 | <a href="#">MORN</a>                                           | <a href="#">RT</a> |  | 3     | 4.5E-2  | 8.5E-1    | 4.3E1 |
| <input type="checkbox"/> | Annotation Cluster 19 | 1.42                                                           | <b>G</b>           |  |       |         |           |       |
| <input type="checkbox"/> | GOTERM_BP_FAT         | <a href="#">negative regulation of apoptosis</a>               | <a href="#">RT</a> |  | 14    | 3.6E-2  | 8.8E-1    | 4.6E1 |
| <input type="checkbox"/> | GOTERM_BP_FAT         | <a href="#">negative regulation of programmed cell death</a>   | <a href="#">RT</a> |  | 14    | 3.9E-2  | 8.8E-1    | 4.9E1 |
| <input type="checkbox"/> | GOTERM_BP_FAT         | <a href="#">negative regulation of cell death</a>              | <a href="#">RT</a> |  | 14    | 4.0E-2  | 8.7E-1    | 5.0E1 |

| Annotation Cluster 1     |                 | Enrichment Score: 6.89                                                                         | G                                                                           |  | Count | P_Value | Benjamini | FDR   |
|--------------------------|-----------------|------------------------------------------------------------------------------------------------|-----------------------------------------------------------------------------|--|-------|---------|-----------|-------|
| Annotation Cluster 20    |                 | Enrichment Score: 1.4                                                                          | G <td></td> <td>Count</td> <td>P_Value</td> <td>Benjamini</td> <td>FDR</td> |  | Count | P_Value | Benjamini | FDR   |
| <input type="checkbox"/> | SP_PIR_KEYWORDS | <a href="#">chromatin regulator</a>                                                            | RT                                                                          |  | 11    | 9.9E-3  | 2.2E-1    | 1.3E1 |
| <input type="checkbox"/> | GOTERM_BP_FAT   | <a href="#">chromatin modification</a>                                                         | RT                                                                          |  | 11    | 6.3E-2  | 9.3E-1    | 6.6E1 |
| <input type="checkbox"/> | GOTERM_BP_FAT   | <a href="#">chromatin organization</a>                                                         | RT                                                                          |  | 13    | 1.0E-1  | 9.6E-1    | 8.3E1 |
| Annotation Cluster 21    |                 | Enrichment Score: 1.34                                                                         | G <td></td> <td>Count</td> <td>P_Value</td> <td>Benjamini</td> <td>FDR</td> |  | Count | P_Value | Benjamini | FDR   |
| <input type="checkbox"/> | UP_SEQ_FEATURE  | nucleotide phosphate-binding region:GTP                                                        | RT                                                                          |  | 13    | 1.5E-2  | 9.0E-1    | 2.2E1 |
| <input type="checkbox"/> | SP_PIR_KEYWORDS | <a href="#">gtp-binding</a>                                                                    | RT                                                                          |  | 13    | 3.1E-2  | 3.7E-1    | 3.5E1 |
| <input type="checkbox"/> | GOTERM_MF_FAT   | <a href="#">GTP binding</a>                                                                    | RT                                                                          |  | 13    | 6.8E-2  | 7.4E-1    | 6.3E1 |
| <input type="checkbox"/> | GOTERM_MF_FAT   | <a href="#">guanyl ribonucleotide binding</a>                                                  | RT                                                                          |  | 13    | 7.8E-2  | 7.7E-1    | 6.9E1 |
| <input type="checkbox"/> | GOTERM_MF_FAT   | <a href="#">guanyl nucleotide binding</a>                                                      | RT                                                                          |  | 13    | 7.8E-2  | 7.7E-1    | 6.9E1 |
| Annotation Cluster 22    |                 | Enrichment Score: 1.32                                                                         | G <td></td> <td>Count</td> <td>P_Value</td> <td>Benjamini</td> <td>FDR</td> |  | Count | P_Value | Benjamini | FDR   |
| <input type="checkbox"/> | SP_PIR_KEYWORDS | <a href="#">DNA damage</a>                                                                     | RT                                                                          |  | 10    | 2.1E-2  | 2.9E-1    | 2.5E1 |
| <input type="checkbox"/> | SP_PIR_KEYWORDS | <a href="#">dna repair</a>                                                                     | RT                                                                          |  | 9     | 3.6E-2  | 4.1E-1    | 4.0E1 |
| <input type="checkbox"/> | GOTERM_BP_FAT   | <a href="#">DNA repair</a>                                                                     | RT                                                                          |  | 11    | 7.6E-2  | 9.5E-1    | 7.3E1 |
| <input type="checkbox"/> | GOTERM_BP_FAT   | <a href="#">response to DNA damage stimulus</a>                                                | RT                                                                          |  | 13    | 9.3E-2  | 9.6E-1    | 8.0E1 |
| Annotation Cluster 23    |                 | Enrichment Score: 1.25                                                                         | G <td></td> <td>Count</td> <td>P_Value</td> <td>Benjamini</td> <td>FDR</td> |  | Count | P_Value | Benjamini | FDR   |
| <input type="checkbox"/> | GOTERM_MF_FAT   | <a href="#">double-stranded RNA binding</a>                                                    | RT                                                                          |  | 4     | 2.7E-2  | 5.8E-1    | 3.2E1 |
| <input type="checkbox"/> | INTERPRO        | <a href="#">Double-stranded RNA binding</a>                                                    | RT                                                                          |  | 3     | 7.3E-2  | 9.7E-1    | 6.8E1 |
| <input type="checkbox"/> | SMART           | <a href="#">DSRM</a>                                                                           | RT                                                                          |  | 3     | 8.9E-2  | 8.2E-1    | 6.8E1 |
| Annotation Cluster 24    |                 | Enrichment Score: 1.15                                                                         | G <td></td> <td>Count</td> <td>P_Value</td> <td>Benjamini</td> <td>FDR</td> |  | Count | P_Value | Benjamini | FDR   |
| <input type="checkbox"/> | GOTERM_BP_FAT   | <a href="#">regulation of I-kappaB kinase/NF-kappaB cascade</a>                                | RT                                                                          |  | 7     | 2.5E-2  | 8.6E-1    | 3.4E1 |
| <input type="checkbox"/> | GOTERM_BP_FAT   | <a href="#">positive regulation of I-kappaB kinase/NF-kappaB cascade</a>                       | RT                                                                          |  | 6     | 5.3E-2  | 9.0E-1    | 6.0E1 |
| <input type="checkbox"/> | GOTERM_BP_FAT   | <a href="#">positive regulation of protein kinase cascade</a>                                  | RT                                                                          |  | 6     | 2.7E-1  | 9.9E-1    | 1.0E2 |
| Annotation Cluster 25    |                 | Enrichment Score: 1.13                                                                         | G <td></td> <td>Count</td> <td>P_Value</td> <td>Benjamini</td> <td>FDR</td> |  | Count | P_Value | Benjamini | FDR   |
| <input type="checkbox"/> | GOTERM_CC_FAT   | <a href="#">insoluble fraction</a>                                                             | RT                                                                          |  | 24    | 4.5E-2  | 3.4E-1    | 4.6E1 |
| <input type="checkbox"/> | GOTERM_CC_FAT   | <a href="#">membrane fraction</a>                                                              | RT                                                                          |  | 23    | 5.3E-2  | 3.8E-1    | 5.2E1 |
| <input type="checkbox"/> | GOTERM_CC_FAT   | <a href="#">cell fraction</a>                                                                  | RT                                                                          |  | 26    | 1.7E-1  | 7.2E-1    | 9.2E1 |
| Annotation Cluster 26    |                 | Enrichment Score: 1.06                                                                         | G <td></td> <td>Count</td> <td>P_Value</td> <td>Benjamini</td> <td>FDR</td> |  | Count | P_Value | Benjamini | FDR   |
| <input type="checkbox"/> | INTERPRO        | <a href="#">Ubiquitin-associated/translation elongation factor EF1B, N-terminal, eukaryote</a> | RT                                                                          |  | 4     | 5.3E-2  | 9.7E-1    | 5.6E1 |
| <input type="checkbox"/> | SMART           | <a href="#">UBA</a>                                                                            | RT                                                                          |  | 4     | 7.0E-2  | 8.6E-1    | 5.9E1 |
| <input type="checkbox"/> | INTERPRO        | <a href="#">Ubiquitin-associated/translation elongation factor EF1B, N-terminal</a>            | RT                                                                          |  | 3     | 1.8E-1  | 1.0E0     | 9.5E1 |
| Annotation Cluster 27    |                 | Enrichment Score: 1.01                                                                         | G <td></td> <td>Count</td> <td>P_Value</td> <td>Benjamini</td> <td>FDR</td> |  | Count | P_Value | Benjamini | FDR   |
| <input type="checkbox"/> | GOTERM_BP_FAT   | <a href="#">transcription, DNA-dependent</a>                                                   | RT                                                                          |  | 11    | 8.7E-2  | 9.5E-1    | 7.8E1 |
| <input type="checkbox"/> | GOTERM_BP_FAT   | <a href="#">RNA biosynthetic process</a>                                                       | RT                                                                          |  | 11    | 9.3E-2  | 9.6E-1    | 8.1E1 |
| <input type="checkbox"/> | GOTERM_BP_FAT   | <a href="#">transcription from RNA polymerase II promoter</a>                                  | RT                                                                          |  | 9     | 1.2E-1  | 9.7E-1    | 8.8E1 |
| Annotation Cluster 28    |                 | Enrichment Score: 1                                                                            | G <td></td> <td>Count</td> <td>P_Value</td> <td>Benjamini</td> <td>FDR</td> |  | Count | P_Value | Benjamini | FDR   |
| <input type="checkbox"/> | SP_PIR_KEYWORDS | <a href="#">nucleotide-binding</a>                                                             | RT                                                                          |  | 43    | 6.8E-2  | 5.2E-1    | 6.2E1 |
| <input type="checkbox"/> | GOTERM_MF_FAT   | <a href="#">nucleotide binding</a>                                                             | RT                                                                          |  | 54    | 9.2E-2  | 8.2E-1    | 7.5E1 |
| <input type="checkbox"/> | GOTERM_MF_FAT   | <a href="#">ribonucleotide binding</a>                                                         | RT                                                                          |  | 45    | 1.0E-1  | 7.9E-1    | 7.8E1 |
| <input type="checkbox"/> | GOTERM_MF_FAT   | <a href="#">purine ribonucleotide binding</a>                                                  | RT                                                                          |  | 45    | 1.0E-1  | 7.9E-1    | 7.8E1 |
| <input type="checkbox"/> | GOTERM_MF_FAT   | <a href="#">purine nucleotide binding</a>                                                      | RT                                                                          |  | 45    | 1.6E-1  | 8.7E-1    | 9.2E1 |
| Annotation Cluster 29    |                 | Enrichment Score: 0.99                                                                         | G <td></td> <td>Count</td> <td>P_Value</td> <td>Benjamini</td> <td>FDR</td> |  | Count | P_Value | Benjamini | FDR   |
| <input type="checkbox"/> | GOTERM_BP_FAT   | <a href="#">cell death</a>                                                                     | RT                                                                          |  | 22    | 7.6E-2  | 9.4E-1    | 7.3E1 |
| <input type="checkbox"/> | GOTERM_BP_FAT   | <a href="#">death</a>                                                                          | RT                                                                          |  | 22    | 7.8E-2  | 9.4E-1    | 7.4E1 |
| <input type="checkbox"/> | GOTERM_BP_FAT   | <a href="#">apoptosis</a>                                                                      | RT                                                                          |  | 18    | 1.3E-1  | 9.7E-1    | 9.0E1 |
| <input type="checkbox"/> | GOTERM_BP_FAT   | <a href="#">programmed cell death</a>                                                          | RT                                                                          |  | 18    | 1.4E-1  | 9.8E-1    | 9.2E1 |
| Annotation Cluster 30    |                 | Enrichment Score: 0.93                                                                         | G <td></td> <td>Count</td> <td>P_Value</td> <td>Benjamini</td> <td>FDR</td> |  | Count | P_Value | Benjamini | FDR   |
| <input type="checkbox"/> | GOTERM_CC_FAT   | <a href="#">mitochondrial membrane</a>                                                         | RT                                                                          |  | 13    | 7.0E-2  | 4.6E-1    | 6.2E1 |
| <input type="checkbox"/> | GOTERM_CC_FAT   | <a href="#">mitochondrial envelope</a>                                                         | RT                                                                          |  | 13    | 9.9E-2  | 5.5E-1    | 7.5E1 |
| <input type="checkbox"/> | GOTERM_CC_FAT   | <a href="#">mitochondrial part</a>                                                             | RT                                                                          |  | 15    | 2.3E-1  | 7.8E-1    | 9.7E1 |
| Annotation Cluster 31    |                 | Enrichment Score: 0.92                                                                         | G <td></td> <td>Count</td> <td>P_Value</td> <td>Benjamini</td> <td>FDR</td> |  | Count | P_Value | Benjamini | FDR   |
| <input type="checkbox"/> | UP_SEQ_FEATURE  | repeat:ANK 8                                                                                   | RT                                                                          |  | 4     | 5.0E-2  | 9.7E-1    | 5.7E1 |
| <input type="checkbox"/> | UP_SEQ_FEATURE  | repeat:ANK 7                                                                                   | RT                                                                          |  | 4     | 1.1E-1  | 1.0E0     | 8.4E1 |

| Annotation Cluster 1     |                 | Enrichment Score: 6.89                                                 | G                  |  | Count | P_Value | Benjamini | FDR   |
|--------------------------|-----------------|------------------------------------------------------------------------|--------------------|--|-------|---------|-----------|-------|
| <input type="checkbox"/> | UP_SEQ_FEATURE  | repeat:ANK 6                                                           | <a href="#">RT</a> |  | 5     | 1.1E-1  | 1.0E0     | 8.5E1 |
| <input type="checkbox"/> | UP_SEQ_FEATURE  | repeat:ANK 9                                                           | <a href="#">RT</a> |  | 3     | 1.7E-1  | 1.0E0     | 9.5E1 |
| <input type="checkbox"/> | UP_SEQ_FEATURE  | repeat:ANK 5                                                           | <a href="#">RT</a> |  | 5     | 2.6E-1  | 1.0E0     | 9.9E1 |
| Annotation Cluster 32    |                 | Enrichment Score: 0.91                                                 | G                  |  | Count | P_Value | Benjamini | FDR   |
| <input type="checkbox"/> | GOTERM_BP_FAT   | <a href="#">negative regulation of protein kinase activity</a>         | <a href="#">RT</a> |  | 5     | 1.1E-1  | 9.7E-1    | 8.6E1 |
| <input type="checkbox"/> | GOTERM_BP_FAT   | <a href="#">negative regulation of kinase activity</a>                 | <a href="#">RT</a> |  | 5     | 1.2E-1  | 9.7E-1    | 8.8E1 |
| <input type="checkbox"/> | GOTERM_BP_FAT   | <a href="#">negative regulation of transferase activity</a>            | <a href="#">RT</a> |  | 5     | 1.4E-1  | 9.8E-1    | 9.2E1 |
| Annotation Cluster 33    |                 | Enrichment Score: 0.9                                                  | G                  |  | Count | P_Value | Benjamini | FDR   |
| <input type="checkbox"/> | SP_PIR_KEYWORDS | <a href="#">Transcription</a>                                          | <a href="#">RT</a> |  | 52    | 5.5E-2  | 4.7E-1    | 5.4E1 |
| <input type="checkbox"/> | SP_PIR_KEYWORDS | <a href="#">transcription regulation</a>                               | <a href="#">RT</a> |  | 49    | 1.0E-1  | 6.3E-1    | 7.7E1 |
| <input type="checkbox"/> | GOTERM_BP_FAT   | <a href="#">transcription</a>                                          | <a href="#">RT</a> |  | 52    | 1.4E-1  | 9.8E-1    | 9.2E1 |
| <input type="checkbox"/> | GOTERM_BP_FAT   | <a href="#">regulation of transcription</a>                            | <a href="#">RT</a> |  | 59    | 3.1E-1  | 9.9E-1    | 1.0E2 |
| Annotation Cluster 34    |                 | Enrichment Score: 0.87                                                 | G                  |  | Count | P_Value | Benjamini | FDR   |
| <input type="checkbox"/> | UP_SEQ_FEATURE  | domain:JmjC                                                            | <a href="#">RT</a> |  | 3     | 1.2E-1  | 1.0E0     | 8.7E1 |
| <input type="checkbox"/> | INTERPRO        | <a href="#">Transcription factor jumonji/aspartyl beta-hydroxylase</a> | <a href="#">RT</a> |  | 3     | 1.3E-1  | 9.9E-1    | 8.8E1 |
| <input type="checkbox"/> | SMART           | <a href="#">JmjC</a>                                                   | <a href="#">RT</a> |  | 3     | 1.6E-1  | 9.4E-1    | 8.7E1 |
| Annotation Cluster 35    |                 | Enrichment Score: 0.87                                                 | G                  |  | Count | P_Value | Benjamini | FDR   |
| <input type="checkbox"/> | GOTERM_MF_FAT   | <a href="#">purine NTP-dependent helicase activity</a>                 | <a href="#">RT</a> |  | 6     | 4.5E-2  | 6.7E-1    | 4.8E1 |
| <input type="checkbox"/> | GOTERM_MF_FAT   | <a href="#">ATP-dependent helicase activity</a>                        | <a href="#">RT</a> |  | 6     | 4.5E-2  | 6.7E-1    | 4.8E1 |
| <input type="checkbox"/> | SP_PIR_KEYWORDS | <a href="#">helicase</a>                                               | <a href="#">RT</a> |  | 6     | 1.3E-1  | 6.9E-1    | 8.4E1 |
| <input type="checkbox"/> | INTERPRO        | <a href="#">DNA/RNA helicase, DEAD/DEAH box type, N-terminal</a>       | <a href="#">RT</a> |  | 4     | 1.3E-1  | 9.9E-1    | 8.7E1 |
| <input type="checkbox"/> | GOTERM_MF_FAT   | <a href="#">helicase activity</a>                                      | <a href="#">RT</a> |  | 6     | 1.4E-1  | 8.6E-1    | 8.9E1 |
| <input type="checkbox"/> | UP_SEQ_FEATURE  | domain:Helicase C-terminal                                             | <a href="#">RT</a> |  | 5     | 1.6E-1  | 1.0E0     | 9.4E1 |
| <input type="checkbox"/> | INTERPRO        | <a href="#">DNA/RNA helicase, C-terminal</a>                           | <a href="#">RT</a> |  | 5     | 1.7E-1  | 1.0E0     | 9.4E1 |
| <input type="checkbox"/> | INTERPRO        | <a href="#">Helicase, superfamily 1 and 2, ATP-binding</a>             | <a href="#">RT</a> |  | 5     | 1.7E-1  | 1.0E0     | 9.4E1 |
| <input type="checkbox"/> | UP_SEQ_FEATURE  | domain:Helicase ATP-binding                                            | <a href="#">RT</a> |  | 5     | 1.7E-1  | 1.0E0     | 9.6E1 |
| <input type="checkbox"/> | INTERPRO        | <a href="#">DEAD-like helicase, N-terminal</a>                         | <a href="#">RT</a> |  | 5     | 1.8E-1  | 1.0E0     | 9.5E1 |
| <input type="checkbox"/> | SMART           | <a href="#">HELICc</a>                                                 | <a href="#">RT</a> |  | 5     | 2.2E-1  | 9.7E-1    | 9.5E1 |
| <input type="checkbox"/> | SMART           | <a href="#">DEXDc</a>                                                  | <a href="#">RT</a> |  | 5     | 2.4E-1  | 9.7E-1    | 9.6E1 |
| Annotation Cluster 36    |                 | Enrichment Score: 0.87                                                 | G                  |  | Count | P_Value | Benjamini | FDR   |
| <input type="checkbox"/> | INTERPRO        | <a href="#">Ubiquitin</a>                                              | <a href="#">RT</a> |  | 4     | 6.6E-2  | 9.7E-1    | 6.4E1 |
| <input type="checkbox"/> | SMART           | <a href="#">UBQ</a>                                                    | <a href="#">RT</a> |  | 4     | 8.7E-2  | 8.4E-1    | 6.7E1 |
| <input type="checkbox"/> | UP_SEQ_FEATURE  | domain:Ubiquitin-like                                                  | <a href="#">RT</a> |  | 3     | 2.0E-1  | 1.0E0     | 9.7E1 |
| <input type="checkbox"/> | INTERPRO        | <a href="#">Ubiquitin supergroup</a>                                   | <a href="#">RT</a> |  | 3     | 2.8E-1  | 1.0E0     | 9.9E1 |
| Annotation Cluster 37    |                 | Enrichment Score: 0.87                                                 | G                  |  | Count | P_Value | Benjamini | FDR   |
| <input type="checkbox"/> | SP_PIR_KEYWORDS | <a href="#">serine/threonine-protein kinase</a>                        | <a href="#">RT</a> |  | 14    | 3.9E-2  | 4.3E-1    | 4.2E1 |
| <input type="checkbox"/> | GOTERM_MF_FAT   | <a href="#">protein serine/threonine kinase activity</a>               | <a href="#">RT</a> |  | 15    | 4.7E-2  | 6.7E-1    | 5.0E1 |
| <input type="checkbox"/> | INTERPRO        | <a href="#">Serine/threonine protein kinase-related</a>                | <a href="#">RT</a> |  | 13    | 6.3E-2  | 9.7E-1    | 6.2E1 |
| <input type="checkbox"/> | INTERPRO        | <a href="#">Serine/threonine protein kinase, active site</a>           | <a href="#">RT</a> |  | 12    | 1.1E-1  | 9.9E-1    | 8.2E1 |
| <input type="checkbox"/> | INTERPRO        | <a href="#">Protein kinase, ATP binding site</a>                       | <a href="#">RT</a> |  | 14    | 1.3E-1  | 9.9E-1    | 8.8E1 |
| <input type="checkbox"/> | UP_SEQ_FEATURE  | domain:Protein kinase                                                  | <a href="#">RT</a> |  | 14    | 1.4E-1  | 1.0E0     | 9.2E1 |
| <input type="checkbox"/> | GOTERM_MF_FAT   | <a href="#">protein kinase activity</a>                                | <a href="#">RT</a> |  | 17    | 1.5E-1  | 8.6E-1    | 9.0E1 |
| <input type="checkbox"/> | INTERPRO        | <a href="#">Protein kinase, core</a>                                   | <a href="#">RT</a> |  | 14    | 1.8E-1  | 1.0E0     | 9.4E1 |
| <input type="checkbox"/> | UP_SEQ_FEATURE  | binding site:ATP                                                       | <a href="#">RT</a> |  | 14    | 2.8E-1  | 1.0E0     | 1.0E2 |
| <input type="checkbox"/> | GOTERM_BP_FAT   | <a href="#">protein amino acid phosphorylation</a>                     | <a href="#">RT</a> |  | 17    | 3.2E-1  | 9.9E-1    | 1.0E2 |
| <input type="checkbox"/> | GOTERM_BP_FAT   | <a href="#">phosphorylation</a>                                        | <a href="#">RT</a> |  | 18    | 5.0E-1  | 1.0E0     | 1.0E2 |
| Annotation Cluster 38    |                 | Enrichment Score: 0.84                                                 | G                  |  | Count | P_Value | Benjamini | FDR   |
| <input type="checkbox"/> | GOTERM_BP_FAT   | <a href="#">stress-activated protein kinase signaling pathway</a>      | <a href="#">RT</a> |  | 5     | 4.3E-2  | 8.7E-1    | 5.2E1 |
| <input type="checkbox"/> | GOTERM_BP_FAT   | <a href="#">JNK cascade</a>                                            | <a href="#">RT</a> |  | 4     | 1.3E-1  | 9.7E-1    | 8.9E1 |
| <input type="checkbox"/> | GOTERM_BP_FAT   | <a href="#">MAPKKK cascade</a>                                         | <a href="#">RT</a> |  | 5     | 5.5E-1  | 1.0E0     | 1.0E2 |
| Annotation Cluster 39    |                 | Enrichment Score: 0.83                                                 | G                  |  | Count | P_Value | Benjamini | FDR   |
| <input type="checkbox"/> | KEGG_PATHWAY    | <a href="#">Steroid biosynthesis</a>                                   | <a href="#">RT</a> |  | 3     | 3.5E-2  | 6.3E-1    | 3.3E1 |

| Annotation Cluster 1     |                 | Enrichment Score: 6.89                                                                         | G  |     | Count | P_Value | Benjamini | FDR   |
|--------------------------|-----------------|------------------------------------------------------------------------------------------------|----|---------------------------------------------------------------------------------------|-------|---------|-----------|-------|
| <input type="checkbox"/> | SP_PIR_KEYWORDS | <a href="#">Steroid biosynthesis</a>                                                           | RT |      | 4     | 4.4E-2  | 4.5E-1    | 4.6E1 |
| <input type="checkbox"/> | GOTERM_BP_FAT   | <a href="#">cholesterol biosynthetic process</a>                                               | RT |      | 3     | 1.0E-1  | 9.6E-1    | 8.4E1 |
| <input type="checkbox"/> | GOTERM_BP_FAT   | <a href="#">sterol biosynthetic process</a>                                                    | RT |      | 3     | 1.7E-1  | 9.8E-1    | 9.5E1 |
| <input type="checkbox"/> | GOTERM_BP_FAT   | <a href="#">steroid biosynthetic process</a>                                                   | RT |      | 4     | 2.6E-1  | 9.9E-1    | 9.9E1 |
| <input type="checkbox"/> | GOTERM_BP_FAT   | <a href="#">cholesterol metabolic process</a>                                                  | RT |      | 4     | 3.0E-1  | 9.9E-1    | 1.0E2 |
| <input type="checkbox"/> | SP_PIR_KEYWORDS | <a href="#">lipid synthesis</a>                                                                | RT |      | 4     | 3.0E-1  | 8.6E-1    | 9.9E1 |
| <input type="checkbox"/> | GOTERM_BP_FAT   | <a href="#">sterol metabolic process</a>                                                       | RT |      | 4     | 3.5E-1  | 9.9E-1    | 1.0E2 |
| Annotation Cluster 40    |                 | Enrichment Score: 0.83                                                                         | G  |    | Count | P_Value | Benjamini | FDR   |
| <input type="checkbox"/> | GOTERM_CC_FAT   | <a href="#">membrane-bounded vesicle</a>                                                       | RT |      | 17    | 7.1E-2  | 4.6E-1    | 6.3E1 |
| <input type="checkbox"/> | GOTERM_CC_FAT   | <a href="#">vesicle</a>                                                                        | RT |      | 18    | 1.3E-1  | 6.3E-1    | 8.4E1 |
| <input type="checkbox"/> | GOTERM_CC_FAT   | <a href="#">cytoplasmic membrane-bounded vesicle</a>                                           | RT |      | 15    | 1.6E-1  | 7.0E-1    | 9.0E1 |
| <input type="checkbox"/> | GOTERM_CC_FAT   | <a href="#">cytoplasmic vesicle</a>                                                            | RT |      | 15    | 3.3E-1  | 8.6E-1    | 9.9E1 |
| Annotation Cluster 41    |                 | Enrichment Score: 0.81                                                                         | G  |    | Count | P_Value | Benjamini | FDR   |
| <input type="checkbox"/> | BIOCARTA        | <a href="#">Influence of Ras and Rho proteins on G1 to S Transition</a>                        | RT |      | 4     | 3.5E-2  | 8.8E-1    | 3.3E1 |
| <input type="checkbox"/> | KEGG_PATHWAY    | <a href="#">B cell receptor signaling pathway</a>                                              | RT |      | 5     | 4.2E-2  | 6.2E-1    | 3.8E1 |
| <input type="checkbox"/> | BIOCARTA        | <a href="#">Angiotensin II mediated activation of JNK Pathway via Pyk2 dependent signaling</a> | RT |      | 4     | 4.7E-2  | 8.5E-1    | 4.2E1 |
| <input type="checkbox"/> | BIOCARTA        | <a href="#">Role of MAL in Rho-Mediated Activation of SRF</a>                                  | RT |      | 3     | 1.1E-1  | 9.4E-1    | 7.5E1 |
| <input type="checkbox"/> | BIOCARTA        | <a href="#">Ras Signaling Pathway</a>                                                          | RT |      | 3     | 1.2E-1  | 9.3E-1    | 7.8E1 |
| <input type="checkbox"/> | KEGG_PATHWAY    | <a href="#">Renal cell carcinoma</a>                                                           | RT |      | 4     | 1.2E-1  | 6.1E-1    | 7.8E1 |
| <input type="checkbox"/> | KEGG_PATHWAY    | <a href="#">VEGF signaling pathway</a>                                                         | RT |      | 4     | 1.4E-1  | 5.8E-1    | 8.3E1 |
| <input type="checkbox"/> | BIOCARTA        | <a href="#">fMLP induced chemokine gene expression in HMC-1 cells</a>                          | RT |      | 3     | 1.8E-1  | 9.5E-1    | 8.9E1 |
| <input type="checkbox"/> | BIOCARTA        | <a href="#">BCR Signaling Pathway</a>                                                          | RT |      | 3     | 1.9E-1  | 9.4E-1    | 9.1E1 |
| <input type="checkbox"/> | BIOCARTA        | <a href="#">Links between Pyk2 and Map Kinases</a>                                             | RT |      | 3     | 1.9E-1  | 9.4E-1    | 9.1E1 |
| <input type="checkbox"/> | BIOCARTA        | <a href="#">T Cell Receptor Signaling Pathway</a>                                              | RT |      | 3     | 2.8E-1  | 9.6E-1    | 9.8E1 |
| <input type="checkbox"/> | KEGG_PATHWAY    | <a href="#">Fc epsilon RI signaling pathway</a>                                                | RT |     | 3     | 4.0E-1  | 7.9E-1    | 1.0E2 |
| <input type="checkbox"/> | KEGG_PATHWAY    | <a href="#">Natural killer cell mediated cytotoxicity</a>                                      | RT |    | 4     | 4.1E-1  | 8.0E-1    | 1.0E2 |
| <input type="checkbox"/> | SP_PIR_KEYWORDS | <a href="#">Proto-oncogene</a>                                                                 | RT |    | 4     | 8.3E-1  | 1.0E0     | 1.0E2 |
| Annotation Cluster 42    |                 | Enrichment Score: 0.81                                                                         | G  |  | Count | P_Value | Benjamini | FDR   |
| <input type="checkbox"/> | GOTERM_BP_FAT   | <a href="#">positive regulation of protein polymerization</a>                                  | RT |    | 4     | 1.5E-2  | 8.4E-1    | 2.2E1 |
| <input type="checkbox"/> | GOTERM_BP_FAT   | <a href="#">positive regulation of actin filament polymerization</a>                           | RT |    | 3     | 2.5E-2  | 8.5E-1    | 3.5E1 |
| <input type="checkbox"/> | GOTERM_BP_FAT   | <a href="#">positive regulation of protein complex assembly</a>                                | RT |    | 4     | 3.6E-2  | 8.8E-1    | 4.6E1 |
| <input type="checkbox"/> | GOTERM_BP_FAT   | <a href="#">positive regulation of cytoskeleton organization</a>                               | RT |    | 4     | 6.8E-2  | 9.3E-1    | 6.9E1 |
| <input type="checkbox"/> | GOTERM_BP_FAT   | <a href="#">positive regulation of organelle organization</a>                                  | RT |    | 5     | 9.6E-2  | 9.6E-1    | 8.2E1 |
| <input type="checkbox"/> | GOTERM_BP_FAT   | <a href="#">regulation of protein complex assembly</a>                                         | RT |    | 5     | 1.2E-1  | 9.7E-1    | 8.8E1 |
| <input type="checkbox"/> | GOTERM_BP_FAT   | <a href="#">regulation of protein polymerization</a>                                           | RT |    | 4     | 1.7E-1  | 9.8E-1    | 9.6E1 |
| <input type="checkbox"/> | GOTERM_BP_FAT   | <a href="#">regulation of actin filament polymerization</a>                                    | RT |    | 3     | 3.1E-1  | 9.9E-1    | 1.0E2 |
| <input type="checkbox"/> | GOTERM_BP_FAT   | <a href="#">regulation of cellular component biogenesis</a>                                    | RT |    | 5     | 3.5E-1  | 9.9E-1    | 1.0E2 |
| <input type="checkbox"/> | GOTERM_BP_FAT   | <a href="#">regulation of actin polymerization or depolymerization</a>                         | RT |    | 3     | 3.7E-1  | 9.9E-1    | 1.0E2 |
| <input type="checkbox"/> | GOTERM_BP_FAT   | <a href="#">regulation of actin filament length</a>                                            | RT |    | 3     | 3.8E-1  | 9.9E-1    | 1.0E2 |
| <input type="checkbox"/> | GOTERM_BP_FAT   | <a href="#">regulation of cytoskeleton organization</a>                                        | RT |    | 4     | 5.4E-1  | 1.0E0     | 1.0E2 |
| <input type="checkbox"/> | GOTERM_BP_FAT   | <a href="#">regulation of actin cytoskeleton organization</a>                                  | RT |    | 3     | 5.6E-1  | 1.0E0     | 1.0E2 |
| <input type="checkbox"/> | GOTERM_BP_FAT   | <a href="#">regulation of actin filament-based process</a>                                     | RT |    | 3     | 5.8E-1  | 1.0E0     | 1.0E2 |
| Annotation Cluster 43    |                 | Enrichment Score: 0.76                                                                         | G  |  | Count | P_Value | Benjamini | FDR   |
| <input type="checkbox"/> | GOTERM_BP_FAT   | <a href="#">protein localization</a>                                                           | RT |    | 24    | 1.6E-1  | 9.8E-1    | 9.5E1 |
| <input type="checkbox"/> | GOTERM_BP_FAT   | <a href="#">protein transport</a>                                                              | RT |    | 21    | 1.7E-1  | 9.8E-1    | 9.6E1 |
| <input type="checkbox"/> | GOTERM_BP_FAT   | <a href="#">establishment of protein localization</a>                                          | RT |    | 21    | 1.9E-1  | 9.8E-1    | 9.7E1 |
| Annotation Cluster 44    |                 | Enrichment Score: 0.73                                                                         | G  |  | Count | P_Value | Benjamini | FDR   |
| <input type="checkbox"/> | GOTERM_BP_FAT   | <a href="#">nucleic acid transport</a>                                                         | RT |    | 5     | 1.5E-1  | 9.8E-1    | 9.3E1 |
| <input type="checkbox"/> | GOTERM_BP_FAT   | <a href="#">RNA transport</a>                                                                  | RT |    | 5     | 1.5E-1  | 9.8E-1    | 9.3E1 |
| <input type="checkbox"/> | GOTERM_BP_FAT   | <a href="#">establishment of RNA localization</a>                                              | RT |    | 5     | 1.5E-1  | 9.8E-1    | 9.3E1 |

| Annotation Cluster 1     |                 | Enrichment Score: 6.89                                                                               | G  |  | Count | P_Value | Benjamini | FDR   |
|--------------------------|-----------------|------------------------------------------------------------------------------------------------------|----|--|-------|---------|-----------|-------|
| <input type="checkbox"/> | GOTERM_BP_FAT   | <a href="#">RNA localization</a>                                                                     | RT |  | 5     | 1.6E-1  | 9.8E-1    | 9.4E1 |
| <input type="checkbox"/> | GOTERM_CC_FAT   | <a href="#">nuclear pore</a>                                                                         | RT |  | 4     | 1.9E-1  | 7.3E-1    | 9.4E1 |
| <input type="checkbox"/> | GOTERM_BP_FAT   | <a href="#">nucleobase, nucleoside, nucleotide and nucleic acid transport</a>                        | RT |  | 5     | 2.1E-1  | 9.8E-1    | 9.8E1 |
| <input type="checkbox"/> | GOTERM_CC_FAT   | <a href="#">pore complex</a>                                                                         | RT |  | 4     | 2.7E-1  | 8.1E-1    | 9.8E1 |
| <input type="checkbox"/> | GOTERM_BP_FAT   | <a href="#">mRNA transport</a>                                                                       | RT |  | 4     | 2.7E-1  | 9.9E-1    | 1.0E2 |
| Annotation Cluster 45    |                 | Enrichment Score: 0.71                                                                               | G  |  | Count | P_Value | Benjamini | FDR   |
| <input type="checkbox"/> | GOTERM_BP_FAT   | <a href="#">positive regulation of neurogenesis</a>                                                  | RT |  | 5     | 3.5E-2  | 9.0E-1    | 4.5E1 |
| <input type="checkbox"/> | GOTERM_BP_FAT   | <a href="#">positive regulation of cell development</a>                                              | RT |  | 5     | 5.6E-2  | 9.1E-1    | 6.2E1 |
| <input type="checkbox"/> | GOTERM_BP_FAT   | <a href="#">regulation of cell development</a>                                                       | RT |  | 7     | 2.6E-1  | 9.9E-1    | 9.9E1 |
| <input type="checkbox"/> | GOTERM_BP_FAT   | <a href="#">regulation of neurogenesis</a>                                                           | RT |  | 6     | 2.7E-1  | 9.9E-1    | 9.9E1 |
| <input type="checkbox"/> | GOTERM_BP_FAT   | <a href="#">positive regulation of developmental process</a>                                         | RT |  | 8     | 3.7E-1  | 9.9E-1    | 1.0E2 |
| <input type="checkbox"/> | GOTERM_BP_FAT   | <a href="#">regulation of nervous system development</a>                                             | RT |  | 6     | 3.8E-1  | 9.9E-1    | 1.0E2 |
| <input type="checkbox"/> | GOTERM_BP_FAT   | <a href="#">positive regulation of cell differentiation</a>                                          | RT |  | 6     | 5.3E-1  | 1.0E0     | 1.0E2 |
| Annotation Cluster 46    |                 | Enrichment Score: 0.69                                                                               | G  |  | Count | P_Value | Benjamini | FDR   |
| <input type="checkbox"/> | GOTERM_BP_FAT   | <a href="#">regulation of phosphorylation</a>                                                        | RT |  | 14    | 1.8E-1  | 9.8E-1    | 9.6E1 |
| <input type="checkbox"/> | GOTERM_BP_FAT   | <a href="#">regulation of phosphorus metabolic process</a>                                           | RT |  | 14    | 2.2E-1  | 9.8E-1    | 9.8E1 |
| <input type="checkbox"/> | GOTERM_BP_FAT   | <a href="#">regulation of phosphate metabolic process</a>                                            | RT |  | 14    | 2.2E-1  | 9.8E-1    | 9.8E1 |
| Annotation Cluster 47    |                 | Enrichment Score: 0.68                                                                               | G  |  | Count | P_Value | Benjamini | FDR   |
| <input type="checkbox"/> | GOTERM_MF_FAT   | <a href="#">protein serine/threonine phosphatase activity</a>                                        | RT |  | 4     | 5.9E-2  | 7.0E-1    | 5.8E1 |
| <input type="checkbox"/> | GOTERM_BP_FAT   | <a href="#">dephosphorylation</a>                                                                    | RT |  | 6     | 2.2E-1  | 9.8E-1    | 9.8E1 |
| <input type="checkbox"/> | GOTERM_MF_FAT   | <a href="#">phosphoprotein phosphatase activity</a>                                                  | RT |  | 6     | 2.3E-1  | 9.4E-1    | 9.8E1 |
| <input type="checkbox"/> | SP_PIR_KEYWORDS | <a href="#">protein phosphatase</a>                                                                  | RT |  | 5     | 2.5E-1  | 8.1E-1    | 9.8E1 |
| <input type="checkbox"/> | GOTERM_BP_FAT   | <a href="#">protein amino acid dephosphorylation</a>                                                 | RT |  | 5     | 3.0E-1  | 9.9E-1    | 1.0E2 |
| <input type="checkbox"/> | GOTERM_MF_FAT   | <a href="#">phosphatase activity</a>                                                                 | RT |  | 7     | 3.7E-1  | 9.8E-1    | 1.0E2 |
| Annotation Cluster 48    |                 | Enrichment Score: 0.66                                                                               | G  |  | Count | P_Value | Benjamini | FDR   |
| <input type="checkbox"/> | UP_SEQ_FEATURE  | region of interest:Modulating                                                                        | RT |  | 3     | 3.0E-2  | 9.2E-1    | 3.9E1 |
| <input type="checkbox"/> | UP_SEQ_FEATURE  | DNA-binding region:Nuclear receptor                                                                  | RT |  | 3     | 2.2E-1  | 1.0E0     | 9.8E1 |
| <input type="checkbox"/> | UP_SEQ_FEATURE  | zinc finger region:NR C4-type                                                                        | RT |  | 3     | 2.2E-1  | 1.0E0     | 9.8E1 |
| <input type="checkbox"/> | INTERPRO        | <a href="#">Zinc finger, nuclear hormone receptor-type</a>                                           | RT |  | 3     | 2.4E-1  | 1.0E0     | 9.8E1 |
| <input type="checkbox"/> | INTERPRO        | <a href="#">Steroid hormone receptor</a>                                                             | RT |  | 3     | 2.5E-1  | 1.0E0     | 9.9E1 |
| <input type="checkbox"/> | GOTERM_MF_FAT   | <a href="#">steroid hormone receptor activity</a>                                                    | RT |  | 3     | 2.5E-1  | 9.5E-1    | 9.8E1 |
| <input type="checkbox"/> | INTERPRO        | <a href="#">Nuclear hormone receptor, ligand-binding</a>                                             | RT |  | 3     | 2.5E-1  | 1.0E0     | 9.9E1 |
| <input type="checkbox"/> | INTERPRO        | <a href="#">Nuclear hormone receptor, ligand-binding, core</a>                                       | RT |  | 3     | 2.5E-1  | 1.0E0     | 9.9E1 |
| <input type="checkbox"/> | INTERPRO        | <a href="#">Zinc finger, NHR/GATA-type</a>                                                           | RT |  | 3     | 2.8E-1  | 1.0E0     | 9.9E1 |
| <input type="checkbox"/> | SMART           | <a href="#">ZnF_C4</a>                                                                               | RT |  | 3     | 2.8E-1  | 9.7E-1    | 9.8E1 |
| <input type="checkbox"/> | SMART           | <a href="#">HOLI</a>                                                                                 | RT |  | 3     | 3.0E-1  | 9.7E-1    | 9.9E1 |
| <input type="checkbox"/> | GOTERM_MF_FAT   | <a href="#">ligand-dependent nuclear receptor activity</a>                                           | RT |  | 3     | 3.2E-1  | 9.7E-1    | 1.0E2 |
| Annotation Cluster 49    |                 | Enrichment Score: 0.64                                                                               | G  |  | Count | P_Value | Benjamini | FDR   |
| <input type="checkbox"/> | INTERPRO        | <a href="#">Ubiquitin-conjugating enzyme, E2</a>                                                     | RT |  | 3     | 2.0E-1  | 1.0E0     | 9.7E1 |
| <input type="checkbox"/> | SMART           | <a href="#">UBCc</a>                                                                                 | RT |  | 3     | 2.4E-1  | 9.6E-1    | 9.6E1 |
| <input type="checkbox"/> | INTERPRO        | <a href="#">Ubiquitin-conjugating enzyme/RWD-like</a>                                                | RT |  | 3     | 2.5E-1  | 1.0E0     | 9.9E1 |
| Annotation Cluster 50    |                 | Enrichment Score: 0.6                                                                                | G  |  | Count | P_Value | Benjamini | FDR   |
| <input type="checkbox"/> | GOTERM_BP_FAT   | <a href="#">RNA splicing, via transesterification reactions with bulged adenosine as nucleophile</a> | RT |  | 6     | 2.2E-1  | 9.8E-1    | 9.8E1 |
| <input type="checkbox"/> | GOTERM_BP_FAT   | <a href="#">RNA splicing, via transesterification reactions</a>                                      | RT |  | 6     | 2.2E-1  | 9.8E-1    | 9.8E1 |
| <input type="checkbox"/> | GOTERM_BP_FAT   | <a href="#">nuclear mRNA splicing, via spliceosome</a>                                               | RT |  | 6     | 2.2E-1  | 9.8E-1    | 9.8E1 |
| <input type="checkbox"/> | GOTERM_BP_FAT   | <a href="#">RNA splicing</a>                                                                         | RT |  | 8     | 3.8E-1  | 9.9E-1    | 1.0E2 |
| Annotation Cluster 51    |                 | Enrichment Score: 0.59                                                                               | G  |  | Count | P_Value | Benjamini | FDR   |
| <input type="checkbox"/> | GOTERM_BP_FAT   | <a href="#">positive regulation of DNA binding</a>                                                   | RT |  | 4     | 1.8E-1  | 9.8E-1    | 9.6E1 |
| <input type="checkbox"/> | GOTERM_BP_FAT   | <a href="#">positive regulation of NF-kappaB transcription factor activity</a>                       | RT |  | 3     | 2.1E-1  | 9.9E-1    | 9.8E1 |
| <input type="checkbox"/> | GOTERM_BP_FAT   | <a href="#">positive regulation of binding</a>                                                       | RT |  | 4     | 2.2E-1  | 9.9E-1    | 9.9E1 |

| Annotation Cluster 1     |                 | Enrichment Score: 6.89                                               | G  |  | Count | P_Value | Benjamini | FDR   |
|--------------------------|-----------------|----------------------------------------------------------------------|----|--|-------|---------|-----------|-------|
| <input type="checkbox"/> | GOTERM_BP_FAT   | <a href="#">regulation of DNA binding</a>                            | RT |  | 5     | 2.5E-1  | 9.9E-1    | 9.9E1 |
| <input type="checkbox"/> | GOTERM_BP_FAT   | <a href="#">positive regulation of transcription factor activity</a> | RT |  | 3     | 3.6E-1  | 9.9E-1    | 1.0E2 |
| <input type="checkbox"/> | GOTERM_BP_FAT   | <a href="#">regulation of binding</a>                                | RT |  | 5     | 4.0E-1  | 9.9E-1    | 1.0E2 |
| Annotation Cluster 52    |                 | Enrichment Score: 0.58                                               | G  |  | Count | P_Value | Benjamini | FDR   |
| <input type="checkbox"/> | SP_PIR_KEYWORDS | <a href="#">mrna_processing</a>                                      | RT |  | 9     | 1.4E-1  | 7.2E-1    | 8.8E1 |
| <input type="checkbox"/> | GOTERM_BP_FAT   | <a href="#">mRNA processing</a>                                      | RT |  | 10    | 2.3E-1  | 9.8E-1    | 9.9E1 |
| <input type="checkbox"/> | GOTERM_BP_FAT   | <a href="#">mRNA metabolic process</a>                               | RT |  | 10    | 3.7E-1  | 9.9E-1    | 1.0E2 |
| <input type="checkbox"/> | GOTERM_BP_FAT   | <a href="#">RNA splicing</a>                                         | RT |  | 8     | 3.8E-1  | 9.9E-1    | 1.0E2 |
| Annotation Cluster 53    |                 | Enrichment Score: 0.57                                               | G  |  | Count | P_Value | Benjamini | FDR   |
| <input type="checkbox"/> | GOTERM_BP_FAT   | <a href="#">induction of apoptosis</a>                               | RT |  | 10    | 2.3E-1  | 9.9E-1    | 9.9E1 |
| <input type="checkbox"/> | GOTERM_BP_FAT   | <a href="#">induction of programmed cell death</a>                   | RT |  | 10    | 2.3E-1  | 9.8E-1    | 9.9E1 |
| <input type="checkbox"/> | GOTERM_BP_FAT   | <a href="#">positive regulation of apoptosis</a>                     | RT |  | 12    | 2.9E-1  | 9.9E-1    | 1.0E2 |
| <input type="checkbox"/> | GOTERM_BP_FAT   | <a href="#">positive regulation of programmed cell death</a>         | RT |  | 12    | 3.0E-1  | 9.9E-1    | 1.0E2 |
| <input type="checkbox"/> | GOTERM_BP_FAT   | <a href="#">positive regulation of cell death</a>                    | RT |  | 12    | 3.0E-1  | 9.9E-1    | 1.0E2 |
| Annotation Cluster 54    |                 | Enrichment Score: 0.54                                               | G  |  | Count | P_Value | Benjamini | FDR   |
| <input type="checkbox"/> | PIR_SUPERFAMILY | PIRSF037037:Kelch-like_protein_gigaxonin                             | RT |  | 3     | 1.6E-1  | 1.0E0     | 8.7E1 |
| <input type="checkbox"/> | UP_SEQ_FEATURE  | repeat:Kelch 4                                                       | RT |  | 4     | 1.6E-1  | 1.0E0     | 9.4E1 |
| <input type="checkbox"/> | SP_PIR_KEYWORDS | <a href="#">kelch repeat</a>                                         | RT |  | 4     | 1.6E-1  | 7.5E-1    | 9.2E1 |
| <input type="checkbox"/> | INTERPRO        | <a href="#">Kelch repeat type 1</a>                                  | RT |  | 4     | 1.6E-1  | 1.0E0     | 9.3E1 |
| <input type="checkbox"/> | INTERPRO        | <a href="#">Kelch-type beta propeller</a>                            | RT |  | 4     | 1.6E-1  | 1.0E0     | 9.3E1 |
| <input type="checkbox"/> | UP_SEQ_FEATURE  | repeat:Kelch 3                                                       | RT |  | 4     | 1.7E-1  | 1.0E0     | 9.5E1 |
| <input type="checkbox"/> | UP_SEQ_FEATURE  | repeat:Kelch 1                                                       | RT |  | 4     | 1.7E-1  | 1.0E0     | 9.5E1 |
| <input type="checkbox"/> | UP_SEQ_FEATURE  | repeat:Kelch 2                                                       | RT |  | 4     | 1.7E-1  | 1.0E0     | 9.5E1 |
| <input type="checkbox"/> | INTERPRO        | <a href="#">Kelch-like protein, gigaxonin</a>                        | RT |  | 3     | 2.0E-1  | 1.0E0     | 9.7E1 |
| <input type="checkbox"/> | SMART           | <a href="#">Kelch</a>                                                | RT |  | 4     | 2.1E-1  | 9.7E-1    | 9.4E1 |
| <input type="checkbox"/> | UP_SEQ_FEATURE  | repeat:Kelch 6                                                       | RT |  | 3     | 2.8E-1  | 1.0E0     | 9.9E1 |
| <input type="checkbox"/> | INTERPRO        | <a href="#">BTB/Kelch-associated</a>                                 | RT |  | 3     | 3.1E-1  | 1.0E0     | 1.0E2 |
| <input type="checkbox"/> | UP_SEQ_FEATURE  | repeat:Kelch 5                                                       | RT |  | 3     | 3.8E-1  | 1.0E0     | 1.0E2 |
| <input type="checkbox"/> | INTERPRO        | <a href="#">BTB/POZ</a>                                              | RT |  | 4     | 4.8E-1  | 1.0E0     | 1.0E2 |
| <input type="checkbox"/> | INTERPRO        | <a href="#">Kelch related</a>                                        | RT |  | 3     | 4.8E-1  | 1.0E0     | 1.0E2 |
| <input type="checkbox"/> | INTERPRO        | <a href="#">BTB/POZ-like</a>                                         | RT |  | 4     | 7.1E-1  | 1.0E0     | 1.0E2 |
| <input type="checkbox"/> | INTERPRO        | <a href="#">BTB/POZ fold</a>                                         | RT |  | 4     | 7.1E-1  | 1.0E0     | 1.0E2 |
| <input type="checkbox"/> | UP_SEQ_FEATURE  | domain:BTB                                                           | RT |  | 3     | 7.8E-1  | 1.0E0     | 1.0E2 |
| <input type="checkbox"/> | SMART           | <a href="#">BTB</a>                                                  | RT |  | 4     | 7.8E-1  | 1.0E0     | 1.0E2 |
| Annotation Cluster 55    |                 | Enrichment Score: 0.5                                                | G  |  | Count | P_Value | Benjamini | FDR   |
| <input type="checkbox"/> | GOTERM_BP_FAT   | <a href="#">positive regulation of cell migration</a>                | RT |  | 4     | 2.9E-1  | 9.9E-1    | 1.0E2 |
| <input type="checkbox"/> | GOTERM_BP_FAT   | <a href="#">positive regulation of cell motion</a>                   | RT |  | 4     | 3.4E-1  | 9.9E-1    | 1.0E2 |
| <input type="checkbox"/> | GOTERM_BP_FAT   | <a href="#">positive regulation of locomotion</a>                    | RT |  | 4     | 3.4E-1  | 9.9E-1    | 1.0E2 |
| Annotation Cluster 56    |                 | Enrichment Score: 0.49                                               | G  |  | Count | P_Value | Benjamini | FDR   |
| <input type="checkbox"/> | INTERPRO        | <a href="#">Zinc finger, PHD-finger</a>                              | RT |  | 4     | 2.5E-1  | 1.0E0     | 9.9E1 |
| <input type="checkbox"/> | INTERPRO        | <a href="#">Zinc finger, PHD-type</a>                                | RT |  | 4     | 2.8E-1  | 1.0E0     | 9.9E1 |
| <input type="checkbox"/> | UP_SEQ_FEATURE  | zinc finger region:PHD-type                                          | RT |  | 3     | 2.8E-1  | 1.0E0     | 9.9E1 |
| <input type="checkbox"/> | SMART           | <a href="#">PHD</a>                                                  | RT |  | 4     | 3.4E-1  | 9.8E-1    | 9.9E1 |
| <input type="checkbox"/> | INTERPRO        | <a href="#">Zinc finger, PHD-type, conserved site</a>                | RT |  | 3     | 5.7E-1  | 1.0E0     | 1.0E2 |
| Annotation Cluster 57    |                 | Enrichment Score: 0.47                                               | G  |  | Count | P_Value | Benjamini | FDR   |
| <input type="checkbox"/> | KEGG_PATHWAY    | <a href="#">GnRH signaling pathway</a>                               | RT |  | 4     | 2.5E-1  | 6.9E-1    | 9.6E1 |
| <input type="checkbox"/> | KEGG_PATHWAY    | <a href="#">Glioma</a>                                               | RT |  | 3     | 3.0E-1  | 7.3E-1    | 9.8E1 |
| <input type="checkbox"/> | KEGG_PATHWAY    | <a href="#">Melanogenesis</a>                                        | RT |  | 3     | 5.2E-1  | 8.6E-1    | 1.0E2 |
| Annotation Cluster 58    |                 | Enrichment Score: 0.47                                               | G  |  | Count | P_Value | Benjamini | FDR   |
| <input type="checkbox"/> | INTERPRO        | <a href="#">Zinc finger, C2H2-like</a>                               | RT |  | 20    | 2.7E-1  | 1.0E0     | 9.9E1 |
| <input type="checkbox"/> | INTERPRO        | <a href="#">Zinc finger, C2H2-type</a>                               | RT |  | 19    | 3.3E-1  | 1.0E0     | 1.0E2 |
| <input type="checkbox"/> | SMART           | <a href="#">ZnF_C2H2</a>                                             | RT |  | 20    | 4.5E-1  | 9.9E-1    | 1.0E2 |
| Annotation Cluster 59    |                 | Enrichment Score: 0.47                                               | G  |  | Count | P_Value | Benjamini | FDR   |



| Annotation Cluster 1     |                 | Enrichment Score: 6.89                                                                                                                        | <b>G</b>           |     | Count | P_Value | Benjamini | FDR   |
|--------------------------|-----------------|-----------------------------------------------------------------------------------------------------------------------------------------------|--------------------|---------------------------------------------------------------------------------------|-------|---------|-----------|-------|
| <input type="checkbox"/> | UP_SEQ_FEATURE  | short sequence motif:Effector region                                                                                                          | <a href="#">RT</a> |      | 4     | 2.9E-1  | 1.0E0     | 1.0E2 |
| <input type="checkbox"/> | INTERPRO        | <a href="#">Ras GTPase</a>                                                                                                                    | <a href="#">RT</a> |      | 5     | 2.9E-1  | 1.0E0     | 9.9E1 |
| <input type="checkbox"/> | INTERPRO        | <a href="#">Ras</a>                                                                                                                           | <a href="#">RT</a> |      | 4     | 4.7E-1  | 1.0E0     | 1.0E2 |
| Annotation Cluster 60    |                 | Enrichment Score: 0.46                                                                                                                        | <b>G</b>           |    | Count | P_Value | Benjamini | FDR   |
| <input type="checkbox"/> | GOTERM_BP_FAT   | <a href="#">regulation of cell migration</a>                                                                                                  | <a href="#">RT</a> |      | 6     | 2.8E-1  | 9.9E-1    | 1.0E2 |
| <input type="checkbox"/> | GOTERM_BP_FAT   | <a href="#">regulation of locomotion</a>                                                                                                      | <a href="#">RT</a> |      | 6     | 3.8E-1  | 9.9E-1    | 1.0E2 |
| <input type="checkbox"/> | GOTERM_BP_FAT   | <a href="#">regulation of cell motion</a>                                                                                                     | <a href="#">RT</a> |      | 6     | 3.8E-1  | 9.9E-1    | 1.0E2 |
| Annotation Cluster 61    |                 | Enrichment Score: 0.45                                                                                                                        | <b>G</b>           |    | Count | P_Value | Benjamini | FDR   |
| <input type="checkbox"/> | GOTERM_BP_FAT   | <a href="#">phosphate metabolic process</a>                                                                                                   | <a href="#">RT</a> |      | 24    | 3.0E-1  | 9.9E-1    | 1.0E2 |
| <input type="checkbox"/> | GOTERM_BP_FAT   | <a href="#">phosphorus metabolic process</a>                                                                                                  | <a href="#">RT</a> |      | 24    | 3.0E-1  | 9.9E-1    | 1.0E2 |
| <input type="checkbox"/> | GOTERM_BP_FAT   | <a href="#">phosphorylation</a>                                                                                                               | <a href="#">RT</a> |      | 18    | 5.0E-1  | 1.0E0     | 1.0E2 |
| Annotation Cluster 62    |                 | Enrichment Score: 0.43                                                                                                                        | <b>G</b>           |    | Count | P_Value | Benjamini | FDR   |
| <input type="checkbox"/> | KEGG_PATHWAY    | <a href="#">Homologous recombination</a>                                                                                                      | <a href="#">RT</a> |      | 3     | 8.5E-2  | 6.7E-1    | 6.4E1 |
| <input type="checkbox"/> | GOTERM_BP_FAT   | <a href="#">M phase of meiotic cell cycle</a>                                                                                                 | <a href="#">RT</a> |      | 3     | 6.1E-1  | 1.0E0     | 1.0E2 |
| <input type="checkbox"/> | GOTERM_BP_FAT   | <a href="#">meiosis</a>                                                                                                                       | <a href="#">RT</a> |      | 3     | 6.1E-1  | 1.0E0     | 1.0E2 |
| <input type="checkbox"/> | GOTERM_BP_FAT   | <a href="#">meiotic cell cycle</a>                                                                                                            | <a href="#">RT</a> |      | 3     | 6.2E-1  | 1.0E0     | 1.0E2 |
| Annotation Cluster 63    |                 | Enrichment Score: 0.42                                                                                                                        | <b>G</b>           |    | Count | P_Value | Benjamini | FDR   |
| <input type="checkbox"/> | SP_PIR_KEYWORDS | <a href="#">dioxygenase</a>                                                                                                                   | <a href="#">RT</a> |      | 3     | 3.7E-1  | 9.0E-1    | 1.0E2 |
| <input type="checkbox"/> | GOTERM_MF_FAT   | <a href="#">oxidoreductase activity, acting on single donors with incorporation of molecular oxygen, incorporation of two atoms of oxygen</a> | <a href="#">RT</a> |      | 3     | 3.8E-1  | 9.8E-1    | 1.0E2 |
| <input type="checkbox"/> | GOTERM_MF_FAT   | <a href="#">oxidoreductase activity, acting on single donors with incorporation of molecular oxygen</a>                                       | <a href="#">RT</a> |      | 3     | 3.8E-1  | 9.8E-1    | 1.0E2 |
| Annotation Cluster 64    |                 | Enrichment Score: 0.42                                                                                                                        | <b>G</b>           |    | Count | P_Value | Benjamini | FDR   |
| <input type="checkbox"/> | GOTERM_BP_FAT   | <a href="#">regulation of kinase activity</a>                                                                                                 | <a href="#">RT</a> |      | 10    | 3.3E-1  | 9.9E-1    | 1.0E2 |
| <input type="checkbox"/> | GOTERM_BP_FAT   | <a href="#">regulation of transferase activity</a>                                                                                            | <a href="#">RT</a> |      | 10    | 3.8E-1  | 9.9E-1    | 1.0E2 |
| <input type="checkbox"/> | GOTERM_BP_FAT   | <a href="#">regulation of protein kinase activity</a>                                                                                         | <a href="#">RT</a> |      | 9     | 4.4E-1  | 9.9E-1    | 1.0E2 |
| Annotation Cluster 65    |                 | Enrichment Score: 0.41                                                                                                                        | <b>G</b>           |    | Count | P_Value | Benjamini | FDR   |
| <input type="checkbox"/> | UP_SEQ_FEATURE  | nucleotide phosphate-binding region:ATP                                                                                                       | <a href="#">RT</a> |      | 25    | 1.4E-1  | 1.0E0     | 9.2E1 |
| <input type="checkbox"/> | SP_PIR_KEYWORDS | <a href="#">atp-binding</a>                                                                                                                   | <a href="#">RT</a> |     | 30    | 3.0E-1  | 8.6E-1    | 9.9E1 |
| <input type="checkbox"/> | GOTERM_MF_FAT   | <a href="#">ATP binding</a>                                                                                                                   | <a href="#">RT</a> |    | 32    | 3.9E-1  | 9.8E-1    | 1.0E2 |
| <input type="checkbox"/> | GOTERM_MF_FAT   | <a href="#">adenyl ribonucleotide binding</a>                                                                                                 | <a href="#">RT</a> |    | 32    | 4.2E-1  | 9.8E-1    | 1.0E2 |
| <input type="checkbox"/> | GOTERM_MF_FAT   | <a href="#">adenyl nucleotide binding</a>                                                                                                     | <a href="#">RT</a> |    | 32    | 5.5E-1  | 9.9E-1    | 1.0E2 |
| <input type="checkbox"/> | GOTERM_MF_FAT   | <a href="#">purine nucleoside binding</a>                                                                                                     | <a href="#">RT</a> |    | 32    | 5.8E-1  | 1.0E0     | 1.0E2 |
| <input type="checkbox"/> | GOTERM_MF_FAT   | <a href="#">nucleoside binding</a>                                                                                                            | <a href="#">RT</a> |    | 32    | 6.0E-1  | 1.0E0     | 1.0E2 |
| Annotation Cluster 66    |                 | Enrichment Score: 0.38                                                                                                                        | <b>G</b>           |  | Count | P_Value | Benjamini | FDR   |
| <input type="checkbox"/> | GOTERM_BP_FAT   | <a href="#">regulation of nuclear division</a>                                                                                                | <a href="#">RT</a> |    | 3     | 3.3E-1  | 9.9E-1    | 1.0E2 |
| <input type="checkbox"/> | GOTERM_BP_FAT   | <a href="#">regulation of mitosis</a>                                                                                                         | <a href="#">RT</a> |    | 3     | 3.3E-1  | 9.9E-1    | 1.0E2 |
| <input type="checkbox"/> | GOTERM_BP_FAT   | <a href="#">regulation of cell cycle process</a>                                                                                              | <a href="#">RT</a> |    | 3     | 6.9E-1  | 1.0E0     | 1.0E2 |
| Annotation Cluster 67    |                 | Enrichment Score: 0.37                                                                                                                        | <b>G</b>           |  | Count | P_Value | Benjamini | FDR   |
| <input type="checkbox"/> | KEGG_PATHWAY    | <a href="#">Fructose and mannose metabolism</a>                                                                                               | <a href="#">RT</a> |    | 3     | 1.2E-1  | 6.7E-1    | 7.6E1 |
| <input type="checkbox"/> | SP_PIR_KEYWORDS | <a href="#">glycolysis</a>                                                                                                                    | <a href="#">RT</a> |    | 3     | 2.1E-1  | 7.8E-1    | 9.6E1 |
| <input type="checkbox"/> | GOTERM_BP_FAT   | <a href="#">glycolysis</a>                                                                                                                    | <a href="#">RT</a> |    | 3     | 2.6E-1  | 9.9E-1    | 9.9E1 |
| <input type="checkbox"/> | KEGG_PATHWAY    | <a href="#">Glycolysis / Gluconeogenesis</a>                                                                                                  | <a href="#">RT</a> |    | 3     | 2.8E-1  | 7.1E-1    | 9.8E1 |
| <input type="checkbox"/> | GOTERM_BP_FAT   | <a href="#">glucose catabolic process</a>                                                                                                     | <a href="#">RT</a> |    | 3     | 3.4E-1  | 9.9E-1    | 1.0E2 |
| <input type="checkbox"/> | GOTERM_BP_FAT   | <a href="#">hexose catabolic process</a>                                                                                                      | <a href="#">RT</a> |    | 3     | 4.3E-1  | 9.9E-1    | 1.0E2 |
| <input type="checkbox"/> | GOTERM_BP_FAT   | <a href="#">monosaccharide catabolic process</a>                                                                                              | <a href="#">RT</a> |    | 3     | 4.4E-1  | 9.9E-1    | 1.0E2 |
| <input type="checkbox"/> | GOTERM_BP_FAT   | <a href="#">alcohol catabolic process</a>                                                                                                     | <a href="#">RT</a> |    | 3     | 5.1E-1  | 1.0E0     | 1.0E2 |
| <input type="checkbox"/> | GOTERM_BP_FAT   | <a href="#">cellular carbohydrate catabolic process</a>                                                                                       | <a href="#">RT</a> |    | 3     | 5.3E-1  | 1.0E0     | 1.0E2 |
| <input type="checkbox"/> | GOTERM_BP_FAT   | <a href="#">glucose metabolic process</a>                                                                                                     | <a href="#">RT</a> |    | 4     | 6.2E-1  | 1.0E0     | 1.0E2 |
| <input type="checkbox"/> | GOTERM_BP_FAT   | <a href="#">carbohydrate catabolic process</a>                                                                                                | <a href="#">RT</a> |    | 3     | 6.7E-1  | 1.0E0     | 1.0E2 |
| <input type="checkbox"/> | GOTERM_BP_FAT   | <a href="#">monosaccharide metabolic process</a>                                                                                              | <a href="#">RT</a> |    | 5     | 6.9E-1  | 1.0E0     | 1.0E2 |
| <input type="checkbox"/> | GOTERM_BP_FAT   | <a href="#">hexose metabolic process</a>                                                                                                      | <a href="#">RT</a> |    | 4     | 7.7E-1  | 1.0E0     | 1.0E2 |
| <input type="checkbox"/> | GOTERM_BP_FAT   | <a href="#">generation of precursor metabolites and energy</a>                                                                                | <a href="#">RT</a> |    | 5     | 9.0E-1  | 1.0E0     | 1.0E2 |
| Annotation Cluster 68    |                 | Enrichment Score: 0.35                                                                                                                        | <b>G</b>           |  | Count | P_Value | Benjamini | FDR   |



|                          | Annotation Cluster           | Enrichment Score                                                                                             |           |  | Count | P_Value | Benjamini | FDR   |
|--------------------------|------------------------------|--------------------------------------------------------------------------------------------------------------|-----------|--|-------|---------|-----------|-------|
| <input type="checkbox"/> | <b>Annotation Cluster 1</b>  | Enrichment Score: 6.89                                                                                       | <b>G</b>  |  |       |         |           |       |
| <input type="checkbox"/> | GOTERM_BP_FAT                | <a href="#">regulation of intracellular transport</a>                                                        | <b>RT</b> |  | 4     | 1.9E-1  | 9.8E-1    | 9.7E1 |
| <input type="checkbox"/> | GOTERM_BP_FAT                | <a href="#">regulation of intracellular protein transport</a>                                                | <b>RT</b> |  | 3     | 3.0E-1  | 9.9E-1    | 1.0E2 |
| <input type="checkbox"/> | GOTERM_BP_FAT                | <a href="#">regulation of nucleocytoplasmic transport</a>                                                    | <b>RT</b> |  | 3     | 3.4E-1  | 9.9E-1    | 1.0E2 |
| <input type="checkbox"/> | GOTERM_BP_FAT                | <a href="#">regulation of protein transport</a>                                                              | <b>RT</b> |  | 3     | 6.9E-1  | 1.0E0     | 1.0E2 |
| <input type="checkbox"/> | GOTERM_BP_FAT                | <a href="#">regulation of establishment of protein localization</a>                                          | <b>RT</b> |  | 3     | 7.2E-1  | 1.0E0     | 1.0E2 |
| <input type="checkbox"/> | GOTERM_BP_FAT                | <a href="#">regulation of protein localization</a>                                                           | <b>RT</b> |  | 3     | 7.9E-1  | 1.0E0     | 1.0E2 |
| <input type="checkbox"/> | <b>Annotation Cluster 69</b> | Enrichment Score: 0.35                                                                                       | <b>G</b>  |  |       |         |           |       |
| <input type="checkbox"/> | GOTERM_BP_FAT                | <a href="#">regulation of cellular response to stress</a>                                                    | <b>RT</b> |  | 4     | 3.7E-1  | 9.9E-1    | 1.0E2 |
| <input type="checkbox"/> | GOTERM_BP_FAT                | <a href="#">regulation of JNK cascade</a>                                                                    | <b>RT</b> |  | 3     | 4.0E-1  | 9.9E-1    | 1.0E2 |
| <input type="checkbox"/> | GOTERM_BP_FAT                | <a href="#">regulation of stress-activated protein kinase signaling pathway</a>                              | <b>RT</b> |  | 3     | 4.3E-1  | 9.9E-1    | 1.0E2 |
| <input type="checkbox"/> | GOTERM_BP_FAT                | <a href="#">regulation of MAPKKK cascade</a>                                                                 | <b>RT</b> |  | 3     | 6.7E-1  | 1.0E0     | 1.0E2 |
| <input type="checkbox"/> | <b>Annotation Cluster 70</b> | Enrichment Score: 0.34                                                                                       | <b>G</b>  |  |       |         |           |       |
| <input type="checkbox"/> | INTERPRO                     | <a href="#">Peptidase C19, ubiquitin carboxyl-terminal hydrolase 2</a>                                       | <b>RT</b> |  | 3     | 3.5E-1  | 1.0E0     | 1.0E2 |
| <input type="checkbox"/> | GOTERM_MF_FAT                | <a href="#">ubiquitin thiolesterase activity</a>                                                             | <b>RT</b> |  | 3     | 4.4E-1  | 9.9E-1    | 1.0E2 |
| <input type="checkbox"/> | GOTERM_MF_FAT                | <a href="#">thiolester hydrolase activity</a>                                                                | <b>RT</b> |  | 3     | 6.0E-1  | 1.0E0     | 1.0E2 |
| <input type="checkbox"/> | <b>Annotation Cluster 71</b> | Enrichment Score: 0.34                                                                                       | <b>G</b>  |  |       |         |           |       |
| <input type="checkbox"/> | INTERPRO                     | <a href="#">RNA recognition motif, RNP-1</a>                                                                 | <b>RT</b> |  | 6     | 4.3E-1  | 1.0E0     | 1.0E2 |
| <input type="checkbox"/> | INTERPRO                     | <a href="#">Nucleotide-binding, alpha-beta plait</a>                                                         | <b>RT</b> |  | 6     | 4.3E-1  | 1.0E0     | 1.0E2 |
| <input type="checkbox"/> | SMART                        | <a href="#">RRM</a>                                                                                          | <b>RT</b> |  | 6     | 5.3E-1  | 1.0E0     | 1.0E2 |
| <input type="checkbox"/> | <b>Annotation Cluster 72</b> | Enrichment Score: 0.33                                                                                       | <b>G</b>  |  |       |         |           |       |
| <input type="checkbox"/> | GOTERM_BP_FAT                | <a href="#">macromolecular complex assembly</a>                                                              | <b>RT</b> |  | 16    | 4.2E-1  | 9.9E-1    | 1.0E2 |
| <input type="checkbox"/> | GOTERM_BP_FAT                | <a href="#">protein complex biogenesis</a>                                                                   | <b>RT</b> |  | 12    | 4.9E-1  | 1.0E0     | 1.0E2 |
| <input type="checkbox"/> | GOTERM_BP_FAT                | <a href="#">protein complex assembly</a>                                                                     | <b>RT</b> |  | 12    | 4.9E-1  | 1.0E0     | 1.0E2 |
| <input type="checkbox"/> | <b>Annotation Cluster 73</b> | Enrichment Score: 0.33                                                                                       | <b>G</b>  |  |       |         |           |       |
| <input type="checkbox"/> | GOTERM_BP_FAT                | <a href="#">negative regulation of nucleobase, nucleoside, nucleotide and nucleic acid metabolic process</a> | <b>RT</b> |  | 13    | 3.9E-1  | 9.9E-1    | 1.0E2 |
| <input type="checkbox"/> | GOTERM_BP_FAT                | <a href="#">negative regulation of nitrogen compound metabolic process</a>                                   | <b>RT</b> |  | 13    | 4.0E-1  | 9.9E-1    | 1.0E2 |
| <input type="checkbox"/> | GOTERM_BP_FAT                | <a href="#">negative regulation of macromolecule biosynthetic process</a>                                    | <b>RT</b> |  | 13    | 4.8E-1  | 1.0E0     | 1.0E2 |
| <input type="checkbox"/> | GOTERM_BP_FAT                | <a href="#">negative regulation of gene expression</a>                                                       | <b>RT</b> |  | 12    | 4.9E-1  | 1.0E0     | 1.0E2 |
| <input type="checkbox"/> | GOTERM_BP_FAT                | <a href="#">negative regulation of transcription</a>                                                         | <b>RT</b> |  | 11    | 5.0E-1  | 1.0E0     | 1.0E2 |
| <input type="checkbox"/> | GOTERM_BP_FAT                | <a href="#">negative regulation of cellular biosynthetic process</a>                                         | <b>RT</b> |  | 13    | 5.0E-1  | 1.0E0     | 1.0E2 |
| <input type="checkbox"/> | GOTERM_BP_FAT                | <a href="#">negative regulation of biosynthetic process</a>                                                  | <b>RT</b> |  | 13    | 5.4E-1  | 1.0E0     | 1.0E2 |
| <input type="checkbox"/> | <b>Annotation Cluster 74</b> | Enrichment Score: 0.3                                                                                        | <b>G</b>  |  |       |         |           |       |
| <input type="checkbox"/> | GOTERM_BP_FAT                | <a href="#">immune response-activating signal transduction</a>                                               | <b>RT</b> |  | 3     | 3.0E-1  | 9.9E-1    | 1.0E2 |
| <input type="checkbox"/> | GOTERM_BP_FAT                | <a href="#">activation of immune response</a>                                                                | <b>RT</b> |  | 4     | 3.1E-1  | 9.9E-1    | 1.0E2 |
| <input type="checkbox"/> | GOTERM_BP_FAT                | <a href="#">immune response-regulating signal transduction</a>                                               | <b>RT</b> |  | 3     | 3.3E-1  | 9.9E-1    | 1.0E2 |
| <input type="checkbox"/> | GOTERM_BP_FAT                | <a href="#">positive regulation of immune response</a>                                                       | <b>RT</b> |  | 4     | 5.9E-1  | 1.0E0     | 1.0E2 |
| <input type="checkbox"/> | GOTERM_BP_FAT                | <a href="#">positive regulation of response to stimulus</a>                                                  | <b>RT</b> |  | 5     | 7.3E-1  | 1.0E0     | 1.0E2 |
| <input type="checkbox"/> | GOTERM_BP_FAT                | <a href="#">positive regulation of immune system process</a>                                                 | <b>RT</b> |  | 5     | 7.4E-1  | 1.0E0     | 1.0E2 |
| <input type="checkbox"/> | GOTERM_BP_FAT                | <a href="#">immune effector process</a>                                                                      | <b>RT</b> |  | 3     | 7.7E-1  | 1.0E0     | 1.0E2 |
| <input type="checkbox"/> | <b>Annotation Cluster 75</b> | Enrichment Score: 0.3                                                                                        | <b>G</b>  |  |       |         |           |       |
| <input type="checkbox"/> | INTERPRO                     | <a href="#">Tetratricopeptide repeat</a>                                                                     | <b>RT</b> |  | 4     | 4.2E-1  | 1.0E0     | 1.0E2 |
| <input type="checkbox"/> | INTERPRO                     | <a href="#">Tetratricopeptide region</a>                                                                     | <b>RT</b> |  | 4     | 4.5E-1  | 1.0E0     | 1.0E2 |
| <input type="checkbox"/> | SMART                        | <a href="#">TPR</a>                                                                                          | <b>RT</b> |  | 4     | 5.0E-1  | 1.0E0     | 1.0E2 |
| <input type="checkbox"/> | UP_SEQ_FEATURE               | repeat:TPR 3                                                                                                 | <b>RT</b> |  | 4     | 5.2E-1  | 1.0E0     | 1.0E2 |
| <input type="checkbox"/> | UP_SEQ_FEATURE               | repeat:TPR 2                                                                                                 | <b>RT</b> |  | 4     | 5.8E-1  | 1.0E0     | 1.0E2 |
| <input type="checkbox"/> | UP_SEQ_FEATURE               | repeat:TPR 1                                                                                                 | <b>RT</b> |  | 4     | 5.8E-1  | 1.0E0     | 1.0E2 |
| <input type="checkbox"/> | <b>Annotation Cluster 76</b> | Enrichment Score: 0.3                                                                                        | <b>G</b>  |  |       |         |           |       |
| <input type="checkbox"/> | GOTERM_BP_FAT                | <a href="#">cellular protein localization</a>                                                                | <b>RT</b> |  | 10    | 4.9E-1  | 1.0E0     | 1.0E2 |
| <input type="checkbox"/> | GOTERM_BP_FAT                | <a href="#">cellular macromolecule localization</a>                                                          | <b>RT</b> |  | 10    | 4.9E-1  | 1.0E0     | 1.0E2 |
| <input type="checkbox"/> | GOTERM_BP_FAT                | <a href="#">intracellular protein transport</a>                                                              | <b>RT</b> |  | 9     | 5.3E-1  | 1.0E0     | 1.0E2 |

| Annotation Cluster 1     |                 | Enrichment Score: 6.89                                                               | <b>G</b>  |  | Count | P_Value | Benjamini | FDR   |
|--------------------------|-----------------|--------------------------------------------------------------------------------------|-----------|--|-------|---------|-----------|-------|
| Annotation Cluster 77    |                 | Enrichment Score: 0.29                                                               | <b>G</b>  |  | Count | P_Value | Benjamini | FDR   |
| <input type="checkbox"/> | GOTERM_BP_FAT   | <a href="#">regulation of caspase activity</a>                                       | <b>RT</b> |  | 3     | 4.9E-1  | 1.0E0     | 1.0E2 |
| <input type="checkbox"/> | GOTERM_BP_FAT   | <a href="#">regulation of endopeptidase activity</a>                                 | <b>RT</b> |  | 3     | 5.1E-1  | 1.0E0     | 1.0E2 |
| <input type="checkbox"/> | GOTERM_BP_FAT   | <a href="#">regulation of peptidase activity</a>                                     | <b>RT</b> |  | 3     | 5.4E-1  | 1.0E0     | 1.0E2 |
| Annotation Cluster 78    |                 | Enrichment Score: 0.28                                                               | <b>G</b>  |  | Count | P_Value | Benjamini | FDR   |
| <input type="checkbox"/> | GOTERM_BP_FAT   | <a href="#">negative regulation of RNA metabolic process</a>                         | <b>RT</b> |  | 9     | 4.9E-1  | 1.0E0     | 1.0E2 |
| <input type="checkbox"/> | GOTERM_BP_FAT   | <a href="#">negative regulation of transcription from RNA polymerase II promoter</a> | <b>RT</b> |  | 7     | 4.9E-1  | 1.0E0     | 1.0E2 |
| <input type="checkbox"/> | GOTERM_BP_FAT   | <a href="#">negative regulation of transcription, DNA-dependent</a>                  | <b>RT</b> |  | 8     | 6.2E-1  | 1.0E0     | 1.0E2 |
| Annotation Cluster 79    |                 | Enrichment Score: 0.27                                                               | <b>G</b>  |  | Count | P_Value | Benjamini | FDR   |
| <input type="checkbox"/> | GOTERM_BP_FAT   | <a href="#">in utero embryonic development</a>                                       | <b>RT</b> |  | 6     | 3.1E-1  | 9.9E-1    | 1.0E2 |
| <input type="checkbox"/> | GOTERM_BP_FAT   | <a href="#">chordate embryonic development</a>                                       | <b>RT</b> |  | 7     | 7.0E-1  | 1.0E0     | 1.0E2 |
| <input type="checkbox"/> | GOTERM_BP_FAT   | <a href="#">embryonic development ending in birth or egg hatching</a>                | <b>RT</b> |  | 7     | 7.0E-1  | 1.0E0     | 1.0E2 |
| Annotation Cluster 80    |                 | Enrichment Score: 0.27                                                               | <b>G</b>  |  | Count | P_Value | Benjamini | FDR   |
| <input type="checkbox"/> | GOTERM_BP_FAT   | <a href="#">positive regulation of defense response</a>                              | <b>RT</b> |  | 3     | 4.5E-1  | 9.9E-1    | 1.0E2 |
| <input type="checkbox"/> | GOTERM_BP_FAT   | <a href="#">regulation of cytokine biosynthetic process</a>                          | <b>RT</b> |  | 3     | 4.6E-1  | 9.9E-1    | 1.0E2 |
| <input type="checkbox"/> | GOTERM_BP_FAT   | <a href="#">regulation of cytokine production</a>                                    | <b>RT</b> |  | 4     | 7.3E-1  | 1.0E0     | 1.0E2 |
| Annotation Cluster 81    |                 | Enrichment Score: 0.27                                                               | <b>G</b>  |  | Count | P_Value | Benjamini | FDR   |
| <input type="checkbox"/> | GOTERM_BP_FAT   | <a href="#">limb morphogenesis</a>                                                   | <b>RT</b> |  | 4     | 3.4E-1  | 9.9E-1    | 1.0E2 |
| <input type="checkbox"/> | GOTERM_BP_FAT   | <a href="#">appendage morphogenesis</a>                                              | <b>RT</b> |  | 4     | 3.4E-1  | 9.9E-1    | 1.0E2 |
| <input type="checkbox"/> | GOTERM_BP_FAT   | <a href="#">appendage development</a>                                                | <b>RT</b> |  | 4     | 3.7E-1  | 9.9E-1    | 1.0E2 |
| <input type="checkbox"/> | GOTERM_BP_FAT   | <a href="#">limb development</a>                                                     | <b>RT</b> |  | 4     | 3.7E-1  | 9.9E-1    | 1.0E2 |
| <input type="checkbox"/> | GOTERM_BP_FAT   | <a href="#">embryonic appendage morphogenesis</a>                                    | <b>RT</b> |  | 3     | 5.5E-1  | 1.0E0     | 1.0E2 |
| <input type="checkbox"/> | GOTERM_BP_FAT   | <a href="#">embryonic limb morphogenesis</a>                                         | <b>RT</b> |  | 3     | 5.5E-1  | 1.0E0     | 1.0E2 |
| <input type="checkbox"/> | GOTERM_BP_FAT   | <a href="#">lung development</a>                                                     | <b>RT</b> |  | 3     | 6.2E-1  | 1.0E0     | 1.0E2 |
| <input type="checkbox"/> | GOTERM_BP_FAT   | <a href="#">respiratory tube development</a>                                         | <b>RT</b> |  | 3     | 6.3E-1  | 1.0E0     | 1.0E2 |
| <input type="checkbox"/> | GOTERM_BP_FAT   | <a href="#">respiratory system development</a>                                       | <b>RT</b> |  | 3     | 6.6E-1  | 1.0E0     | 1.0E2 |
| <input type="checkbox"/> | GOTERM_BP_FAT   | <a href="#">tube development</a>                                                     | <b>RT</b> |  | 3     | 9.5E-1  | 1.0E0     | 1.0E2 |
| <input type="checkbox"/> | GOTERM_BP_FAT   | <a href="#">embryonic morphogenesis</a>                                              | <b>RT</b> |  | 4     | 9.6E-1  | 1.0E0     | 1.0E2 |
| Annotation Cluster 82    |                 | Enrichment Score: 0.26                                                               | <b>G</b>  |  | Count | P_Value | Benjamini | FDR   |
| <input type="checkbox"/> | UP_SEQ_FEATURE  | repeat:LRR 4                                                                         | <b>RT</b> |  | 7     | 3.8E-1  | 1.0E0     | 1.0E2 |
| <input type="checkbox"/> | UP_SEQ_FEATURE  | repeat:LRR 3                                                                         | <b>RT</b> |  | 7     | 5.5E-1  | 1.0E0     | 1.0E2 |
| <input type="checkbox"/> | UP_SEQ_FEATURE  | repeat:LRR 1                                                                         | <b>RT</b> |  | 7     | 6.1E-1  | 1.0E0     | 1.0E2 |
| <input type="checkbox"/> | UP_SEQ_FEATURE  | repeat:LRR 2                                                                         | <b>RT</b> |  | 7     | 6.1E-1  | 1.0E0     | 1.0E2 |
| <input type="checkbox"/> | SP_PIR_KEYWORDS | <a href="#">leucine-rich repeat</a>                                                  | <b>RT</b> |  | 7     | 6.1E-1  | 9.7E-1    | 1.0E2 |
| Annotation Cluster 83    |                 | Enrichment Score: 0.25                                                               | <b>G</b>  |  | Count | P_Value | Benjamini | FDR   |
| <input type="checkbox"/> | GOTERM_BP_FAT   | <a href="#">nuclear import</a>                                                       | <b>RT</b> |  | 4     | 2.8E-1  | 9.9E-1    | 1.0E2 |
| <input type="checkbox"/> | GOTERM_BP_FAT   | <a href="#">protein import into nucleus</a>                                          | <b>RT</b> |  | 3     | 5.4E-1  | 1.0E0     | 1.0E2 |
| <input type="checkbox"/> | GOTERM_BP_FAT   | <a href="#">protein localization in nucleus</a>                                      | <b>RT</b> |  | 3     | 5.9E-1  | 1.0E0     | 1.0E2 |
| <input type="checkbox"/> | GOTERM_BP_FAT   | <a href="#">protein import</a>                                                       | <b>RT</b> |  | 3     | 7.6E-1  | 1.0E0     | 1.0E2 |
| <input type="checkbox"/> | GOTERM_BP_FAT   | <a href="#">protein localization in organelle</a>                                    | <b>RT</b> |  | 3     | 8.1E-1  | 1.0E0     | 1.0E2 |
| Annotation Cluster 84    |                 | Enrichment Score: 0.24                                                               | <b>G</b>  |  | Count | P_Value | Benjamini | FDR   |
| <input type="checkbox"/> | KEGG_PATHWAY    | <a href="#">Spliceosome</a>                                                          | <b>RT</b> |  | 4     | 3.8E-1  | 7.8E-1    | 1.0E2 |
| <input type="checkbox"/> | SP_PIR_KEYWORDS | <a href="#">Spliceosome</a>                                                          | <b>RT</b> |  | 3     | 6.9E-1  | 9.8E-1    | 1.0E2 |
| <input type="checkbox"/> | GOTERM_CC_FAT   | <a href="#">spliceosome</a>                                                          | <b>RT</b> |  | 3     | 7.1E-1  | 9.9E-1    | 1.0E2 |
| Annotation Cluster 85    |                 | Enrichment Score: 0.23                                                               | <b>G</b>  |  | Count | P_Value | Benjamini | FDR   |
| <input type="checkbox"/> | GOTERM_BP_FAT   | <a href="#">cell projection morphogenesis</a>                                        | <b>RT</b> |  | 7     | 4.1E-1  | 9.9E-1    | 1.0E2 |
| <input type="checkbox"/> | GOTERM_BP_FAT   | <a href="#">cell part morphogenesis</a>                                              | <b>RT</b> |  | 7     | 4.5E-1  | 9.9E-1    | 1.0E2 |
| <input type="checkbox"/> | GOTERM_BP_FAT   | <a href="#">cell projection organization</a>                                         | <b>RT</b> |  | 9     | 5.1E-1  | 1.0E0     | 1.0E2 |
| <input type="checkbox"/> | GOTERM_BP_FAT   | <a href="#">cellular component morphogenesis</a>                                     | <b>RT</b> |  | 9     | 5.9E-1  | 1.0E0     | 1.0E2 |
| <input type="checkbox"/> | GOTERM_BP_FAT   | <a href="#">cell morphogenesis</a>                                                   | <b>RT</b> |  | 8     | 6.2E-1  | 1.0E0     | 1.0E2 |
| <input type="checkbox"/> | GOTERM_BP_FAT   | <a href="#">neuron development</a>                                                   | <b>RT</b> |  | 6     | 8.4E-1  | 1.0E0     | 1.0E2 |
| <input type="checkbox"/> | GOTERM_BP_FAT   | <a href="#">neuron differentiation</a>                                               | <b>RT</b> |  | 7     | 9.0E-1  | 1.0E0     | 1.0E2 |
| Annotation Cluster 86    |                 | Enrichment Score: 0.22                                                               | <b>G</b>  |  | Count | P_Value | Benjamini | FDR   |

| Annotation Cluster 1     |                | Enrichment Score: 6.89                                                                   | G  |  | Count | P_Value | Benjamini | FDR   |
|--------------------------|----------------|------------------------------------------------------------------------------------------|----|--|-------|---------|-----------|-------|
| <input type="checkbox"/> | GOTERM_BP_FAT  | <a href="#">cellular ion homeostasis</a>                                                 | RT |  | 9     | 5.3E-1  | 1.0E0     | 1.0E2 |
| <input type="checkbox"/> | GOTERM_BP_FAT  | <a href="#">cellular chemical homeostasis</a>                                            | RT |  | 9     | 5.5E-1  | 1.0E0     | 1.0E2 |
| <input type="checkbox"/> | GOTERM_BP_FAT  | <a href="#">ion homeostasis</a>                                                          | RT |  | 9     | 6.3E-1  | 1.0E0     | 1.0E2 |
| <input type="checkbox"/> | GOTERM_BP_FAT  | <a href="#">chemical homeostasis</a>                                                     | RT |  | 10    | 7.5E-1  | 1.0E0     | 1.0E2 |
| Annotation Cluster 87    |                | Enrichment Score: 0.22                                                                   | G  |  | Count | P_Value | Benjamini | FDR   |
| <input type="checkbox"/> | GOTERM_BP_FAT  | <a href="#">purine ribonucleotide biosynthetic process</a>                               | RT |  | 4     | 4.4E-1  | 9.9E-1    | 1.0E2 |
| <input type="checkbox"/> | GOTERM_BP_FAT  | <a href="#">ribonucleotide biosynthetic process</a>                                      | RT |  | 4     | 4.8E-1  | 1.0E0     | 1.0E2 |
| <input type="checkbox"/> | GOTERM_BP_FAT  | <a href="#">nucleoside triphosphate metabolic process</a>                                | RT |  | 4     | 5.2E-1  | 1.0E0     | 1.0E2 |
| <input type="checkbox"/> | GOTERM_BP_FAT  | <a href="#">nucleotide biosynthetic process</a>                                          | RT |  | 5     | 5.5E-1  | 1.0E0     | 1.0E2 |
| <input type="checkbox"/> | GOTERM_BP_FAT  | <a href="#">purine ribonucleotide metabolic process</a>                                  | RT |  | 4     | 5.5E-1  | 1.0E0     | 1.0E2 |
| <input type="checkbox"/> | GOTERM_BP_FAT  | <a href="#">ATP biosynthetic process</a>                                                 | RT |  | 3     | 5.6E-1  | 1.0E0     | 1.0E2 |
| <input type="checkbox"/> | GOTERM_BP_FAT  | <a href="#">nucleobase, nucleoside and nucleotide biosynthetic process</a>               | RT |  | 5     | 5.8E-1  | 1.0E0     | 1.0E2 |
| <input type="checkbox"/> | GOTERM_BP_FAT  | <a href="#">nucleobase, nucleoside, nucleotide and nucleic acid biosynthetic process</a> | RT |  | 5     | 5.8E-1  | 1.0E0     | 1.0E2 |
| <input type="checkbox"/> | GOTERM_BP_FAT  | <a href="#">ribonucleotide metabolic process</a>                                         | RT |  | 4     | 6.0E-1  | 1.0E0     | 1.0E2 |
| <input type="checkbox"/> | GOTERM_BP_FAT  | <a href="#">purine nucleotide biosynthetic process</a>                                   | RT |  | 4     | 6.0E-1  | 1.0E0     | 1.0E2 |
| <input type="checkbox"/> | GOTERM_BP_FAT  | <a href="#">purine ribonucleoside triphosphate biosynthetic process</a>                  | RT |  | 3     | 6.1E-1  | 1.0E0     | 1.0E2 |
| <input type="checkbox"/> | GOTERM_BP_FAT  | <a href="#">ribonucleoside triphosphate biosynthetic process</a>                         | RT |  | 3     | 6.2E-1  | 1.0E0     | 1.0E2 |
| <input type="checkbox"/> | GOTERM_BP_FAT  | <a href="#">purine nucleoside triphosphate biosynthetic process</a>                      | RT |  | 3     | 6.2E-1  | 1.0E0     | 1.0E2 |
| <input type="checkbox"/> | GOTERM_BP_FAT  | <a href="#">nucleoside triphosphate biosynthetic process</a>                             | RT |  | 3     | 6.3E-1  | 1.0E0     | 1.0E2 |
| <input type="checkbox"/> | GOTERM_BP_FAT  | <a href="#">ATP metabolic process</a>                                                    | RT |  | 3     | 6.5E-1  | 1.0E0     | 1.0E2 |
| <input type="checkbox"/> | GOTERM_BP_FAT  | <a href="#">purine ribonucleoside triphosphate metabolic process</a>                     | RT |  | 3     | 7.1E-1  | 1.0E0     | 1.0E2 |
| <input type="checkbox"/> | GOTERM_BP_FAT  | <a href="#">ribonucleoside triphosphate metabolic process</a>                            | RT |  | 3     | 7.1E-1  | 1.0E0     | 1.0E2 |
| <input type="checkbox"/> | GOTERM_BP_FAT  | <a href="#">purine nucleoside triphosphate metabolic process</a>                         | RT |  | 3     | 7.3E-1  | 1.0E0     | 1.0E2 |
| <input type="checkbox"/> | GOTERM_BP_FAT  | <a href="#">purine nucleotide metabolic process</a>                                      | RT |  | 4     | 7.5E-1  | 1.0E0     | 1.0E2 |
| <input type="checkbox"/> | GOTERM_BP_FAT  | <a href="#">nitrogen compound biosynthetic process</a>                                   | RT |  | 6     | 8.1E-1  | 1.0E0     | 1.0E2 |
| Annotation Cluster 88    |                | Enrichment Score: 0.2                                                                    | G  |  | Count | P_Value | Benjamini | FDR   |
| <input type="checkbox"/> | GOTERM_BP_FAT  | <a href="#">leukocyte activation</a>                                                     | RT |  | 6     | 5.7E-1  | 1.0E0     | 1.0E2 |
| <input type="checkbox"/> | GOTERM_BP_FAT  | <a href="#">lymphocyte activation</a>                                                    | RT |  | 5     | 6.0E-1  | 1.0E0     | 1.0E2 |
| <input type="checkbox"/> | GOTERM_BP_FAT  | <a href="#">cell activation</a>                                                          | RT |  | 6     | 7.2E-1  | 1.0E0     | 1.0E2 |
| Annotation Cluster 89    |                | Enrichment Score: 0.16                                                                   | G  |  | Count | P_Value | Benjamini | FDR   |
| <input type="checkbox"/> | INTERPRO       | <a href="#">EF-HAND 1</a>                                                                | RT |  | 5     | 6.5E-1  | 1.0E0     | 1.0E2 |
| <input type="checkbox"/> | UP_SEQ_FEATURE | calcium-binding region:2                                                                 | RT |  | 3     | 6.7E-1  | 1.0E0     | 1.0E2 |
| <input type="checkbox"/> | UP_SEQ_FEATURE | domain:EF-hand 2                                                                         | RT |  | 4     | 7.0E-1  | 1.0E0     | 1.0E2 |
| <input type="checkbox"/> | UP_SEQ_FEATURE | domain:EF-hand 1                                                                         | RT |  | 4     | 7.0E-1  | 1.0E0     | 1.0E2 |
| <input type="checkbox"/> | UP_SEQ_FEATURE | calcium-binding region:1                                                                 | RT |  | 3     | 7.2E-1  | 1.0E0     | 1.0E2 |
| Annotation Cluster 90    |                | Enrichment Score: 0.16                                                                   | G  |  | Count | P_Value | Benjamini | FDR   |
| <input type="checkbox"/> | GOTERM_CC_FAT  | <a href="#">focal adhesion</a>                                                           | RT |  | 3     | 5.8E-1  | 9.7E-1    | 1.0E2 |
| <input type="checkbox"/> | GOTERM_CC_FAT  | <a href="#">cell-substrate adherens junction</a>                                         | RT |  | 3     | 6.0E-1  | 9.7E-1    | 1.0E2 |
| <input type="checkbox"/> | GOTERM_CC_FAT  | <a href="#">cell-substrate junction</a>                                                  | RT |  | 3     | 6.3E-1  | 9.8E-1    | 1.0E2 |
| <input type="checkbox"/> | GOTERM_CC_FAT  | <a href="#">basolateral plasma membrane</a>                                              | RT |  | 4     | 7.4E-1  | 9.9E-1    | 1.0E2 |
| <input type="checkbox"/> | GOTERM_CC_FAT  | <a href="#">adherens junction</a>                                                        | RT |  | 3     | 7.9E-1  | 9.9E-1    | 1.0E2 |
| <input type="checkbox"/> | GOTERM_CC_FAT  | <a href="#">anchoring junction</a>                                                       | RT |  | 3     | 8.4E-1  | 1.0E0     | 1.0E2 |
| Annotation Cluster 91    |                | Enrichment Score: 0.16                                                                   | G  |  | Count | P_Value | Benjamini | FDR   |
| <input type="checkbox"/> | UP_SEQ_FEATURE | repeat:LRR 6                                                                             | RT |  | 5     | 6.0E-1  | 1.0E0     | 1.0E2 |
| <input type="checkbox"/> | UP_SEQ_FEATURE | repeat:LRR 5                                                                             | RT |  | 5     | 6.8E-1  | 1.0E0     | 1.0E2 |
| <input type="checkbox"/> | INTERPRO       | <a href="#">Leucine-rich repeat</a>                                                      | RT |  | 4     | 8.1E-1  | 1.0E0     | 1.0E2 |
| Annotation Cluster 92    |                | Enrichment Score: 0.16                                                                   | G  |  | Count | P_Value | Benjamini | FDR   |
| <input type="checkbox"/> | GOTERM_BP_FAT  | <a href="#">angiogenesis</a>                                                             | RT |  | 4     | 6.0E-1  | 1.0E0     | 1.0E2 |
| <input type="checkbox"/> | GOTERM_BP_FAT  | <a href="#">blood vessel morphogenesis</a>                                               | RT |  | 5     | 6.5E-1  | 1.0E0     | 1.0E2 |
| <input type="checkbox"/> | GOTERM_BP_FAT  | <a href="#">blood vessel development</a>                                                 | RT |  | 5     | 7.6E-1  | 1.0E0     | 1.0E2 |
| <input type="checkbox"/> | GOTERM_BP_FAT  | <a href="#">vasculature development</a>                                                  | RT |  | 5     | 7.7E-1  | 1.0E0     | 1.0E2 |

| Annotation Cluster 1     |                | Enrichment Score: 6.89                                                     | G  |  | Count | P_Value | Benjamini | FDR   |
|--------------------------|----------------|----------------------------------------------------------------------------|----|--|-------|---------|-----------|-------|
| Annotation Cluster 93    |                | Enrichment Score: 0.15                                                     | G  |  | Count | P_Value | Benjamini | FDR   |
| <input type="checkbox"/> | GOTERM_BP_FAT  | <a href="#">axonogenesis</a>                                               | RT |  | 5     | 5.8E-1  | 1.0E0     | 1.0E2 |
| <input type="checkbox"/> | GOTERM_BP_FAT  | <a href="#">cell morphogenesis involved in neuron differentiation</a>      | RT |  | 5     | 6.4E-1  | 1.0E0     | 1.0E2 |
| <input type="checkbox"/> | GOTERM_BP_FAT  | <a href="#">neuron projection morphogenesis</a>                            | RT |  | 5     | 6.5E-1  | 1.0E0     | 1.0E2 |
| <input type="checkbox"/> | GOTERM_BP_FAT  | <a href="#">cell morphogenesis involved in differentiation</a>             | RT |  | 5     | 7.5E-1  | 1.0E0     | 1.0E2 |
| <input type="checkbox"/> | GOTERM_BP_FAT  | <a href="#">neuron projection development</a>                              | RT |  | 5     | 7.9E-1  | 1.0E0     | 1.0E2 |
| <input type="checkbox"/> | GOTERM_BP_FAT  | <a href="#">neuron development</a>                                         | RT |  | 6     | 8.4E-1  | 1.0E0     | 1.0E2 |
| Annotation Cluster 94    |                | Enrichment Score: 0.15                                                     | G  |  | Count | P_Value | Benjamini | FDR   |
| <input type="checkbox"/> | GOTERM_BP_FAT  | <a href="#">taxis</a>                                                      | RT |  | 4     | 6.5E-1  | 1.0E0     | 1.0E2 |
| <input type="checkbox"/> | GOTERM_BP_FAT  | <a href="#">chemotaxis</a>                                                 | RT |  | 4     | 6.5E-1  | 1.0E0     | 1.0E2 |
| <input type="checkbox"/> | GOTERM_BP_FAT  | <a href="#">locomotory behavior</a>                                        | RT |  | 5     | 8.3E-1  | 1.0E0     | 1.0E2 |
| Annotation Cluster 95    |                | Enrichment Score: 0.13                                                     | G  |  | Count | P_Value | Benjamini | FDR   |
| <input type="checkbox"/> | UP_SEQ_FEATURE | zinc finger region:C2H2-type 13                                            | RT |  | 5     | 5.7E-1  | 1.0E0     | 1.0E2 |
| <input type="checkbox"/> | UP_SEQ_FEATURE | zinc finger region:C2H2-type 14                                            | RT |  | 4     | 6.1E-1  | 1.0E0     | 1.0E2 |
| <input type="checkbox"/> | UP_SEQ_FEATURE | zinc finger region:C2H2-type 12                                            | RT |  | 5     | 7.4E-1  | 1.0E0     | 1.0E2 |
| <input type="checkbox"/> | UP_SEQ_FEATURE | zinc finger region:C2H2-type 11                                            | RT |  | 5     | 8.4E-1  | 1.0E0     | 1.0E2 |
| <input type="checkbox"/> | UP_SEQ_FEATURE | zinc finger region:C2H2-type 9                                             | RT |  | 6     | 8.7E-1  | 1.0E0     | 1.0E2 |
| <input type="checkbox"/> | UP_SEQ_FEATURE | zinc finger region:C2H2-type 10                                            | RT |  | 5     | 9.0E-1  | 1.0E0     | 1.0E2 |
| Annotation Cluster 96    |                | Enrichment Score: 0.12                                                     | G  |  | Count | P_Value | Benjamini | FDR   |
| <input type="checkbox"/> | GOTERM_BP_FAT  | <a href="#">regulation of Ras GTPase activity</a>                          | RT |  | 3     | 6.4E-1  | 1.0E0     | 1.0E2 |
| <input type="checkbox"/> | GOTERM_BP_FAT  | <a href="#">regulation of GTPase activity</a>                              | RT |  | 3     | 7.3E-1  | 1.0E0     | 1.0E2 |
| <input type="checkbox"/> | GOTERM_MF_FAT  | <a href="#">small GTPase regulator activity</a>                            | RT |  | 4     | 9.1E-1  | 1.0E0     | 1.0E2 |
| Annotation Cluster 97    |                | Enrichment Score: 0.12                                                     | G  |  | Count | P_Value | Benjamini | FDR   |
| <input type="checkbox"/> | GOTERM_BP_FAT  | <a href="#">positive regulation of nitrogen compound metabolic process</a> | RT |  | 14    | 5.9E-1  | 1.0E0     | 1.0E2 |
| <input type="checkbox"/> | GOTERM_BP_FAT  | <a href="#">positive regulation of macromolecule biosynthetic process</a>  | RT |  | 13    | 7.2E-1  | 1.0E0     | 1.0E2 |
| <input type="checkbox"/> | GOTERM_BP_FAT  | <a href="#">positive regulation of cellular biosynthetic process</a>       | RT |  | 13    | 7.8E-1  | 1.0E0     | 1.0E2 |
| <input type="checkbox"/> | GOTERM_BP_FAT  | <a href="#">positive regulation of biosynthetic process</a>                | RT |  | 13    | 7.9E-1  | 1.0E0     | 1.0E2 |
| <input type="checkbox"/> | GOTERM_BP_FAT  | <a href="#">positive regulation of transcription</a>                       | RT |  | 10    | 8.4E-1  | 1.0E0     | 1.0E2 |
| <input type="checkbox"/> | GOTERM_BP_FAT  | <a href="#">positive regulation of gene expression</a>                     | RT |  | 10    | 8.6E-1  | 1.0E0     | 1.0E2 |
| Annotation Cluster 98    |                | Enrichment Score: 0.12                                                     | G  |  | Count | P_Value | Benjamini | FDR   |
| <input type="checkbox"/> | UP_SEQ_FEATURE | domain:PDZ                                                                 | RT |  | 3     | 6.4E-1  | 1.0E0     | 1.0E2 |
| <input type="checkbox"/> | INTERPRO       | <a href="#">PDZ/DHR/GLGF</a>                                               | RT |  | 3     | 8.1E-1  | 1.0E0     | 1.0E2 |
| <input type="checkbox"/> | SMART          | <a href="#">PDZ</a>                                                        | RT |  | 3     | 8.6E-1  | 1.0E0     | 1.0E2 |
| Annotation Cluster 99    |                | Enrichment Score: 0.11                                                     | G  |  | Count | P_Value | Benjamini | FDR   |
| <input type="checkbox"/> | GOTERM_BP_FAT  | <a href="#">cellular di-, tri-valent inorganic cation homeostasis</a>      | RT |  | 5     | 7.0E-1  | 1.0E0     | 1.0E2 |
| <input type="checkbox"/> | GOTERM_BP_FAT  | <a href="#">di-, tri-valent inorganic cation homeostasis</a>               | RT |  | 5     | 7.4E-1  | 1.0E0     | 1.0E2 |
| <input type="checkbox"/> | GOTERM_BP_FAT  | <a href="#">cellular calcium ion homeostasis</a>                           | RT |  | 4     | 7.4E-1  | 1.0E0     | 1.0E2 |
| <input type="checkbox"/> | GOTERM_BP_FAT  | <a href="#">calcium ion homeostasis</a>                                    | RT |  | 4     | 7.6E-1  | 1.0E0     | 1.0E2 |
| <input type="checkbox"/> | GOTERM_BP_FAT  | <a href="#">cellular metal ion homeostasis</a>                             | RT |  | 4     | 7.8E-1  | 1.0E0     | 1.0E2 |
| <input type="checkbox"/> | GOTERM_BP_FAT  | <a href="#">cellular cation homeostasis</a>                                | RT |  | 5     | 7.8E-1  | 1.0E0     | 1.0E2 |
| <input type="checkbox"/> | GOTERM_BP_FAT  | <a href="#">metal ion homeostasis</a>                                      | RT |  | 4     | 8.1E-1  | 1.0E0     | 1.0E2 |
| <input type="checkbox"/> | GOTERM_BP_FAT  | <a href="#">cation homeostasis</a>                                         | RT |  | 5     | 8.5E-1  | 1.0E0     | 1.0E2 |
| Annotation Cluster 100   |                | Enrichment Score: 0.11                                                     | G  |  | Count | P_Value | Benjamini | FDR   |
| <input type="checkbox"/> | UP_SEQ_FEATURE | zinc finger region:C2H2-type 4                                             | RT |  | 11    | 7.1E-1  | 1.0E0     | 1.0E2 |
| <input type="checkbox"/> | UP_SEQ_FEATURE | zinc finger region:C2H2-type 5                                             | RT |  | 10    | 7.4E-1  | 1.0E0     | 1.0E2 |
| <input type="checkbox"/> | UP_SEQ_FEATURE | zinc finger region:C2H2-type 2                                             | RT |  | 11    | 7.7E-1  | 1.0E0     | 1.0E2 |
| <input type="checkbox"/> | UP_SEQ_FEATURE | zinc finger region:C2H2-type 3                                             | RT |  | 11    | 7.9E-1  | 1.0E0     | 1.0E2 |
| <input type="checkbox"/> | INTERPRO       | <a href="#">Zinc finger, C2H2-type/integrase, DNA-binding</a>              | RT |  | 10    | 8.9E-1  | 1.0E0     | 1.0E2 |
| Annotation Cluster 101   |                | Enrichment Score: 0.1                                                      | G  |  | Count | P_Value | Benjamini | FDR   |
| <input type="checkbox"/> | GOTERM_BP_FAT  | <a href="#">hemopoiesis</a>                                                | RT |  | 5     | 7.3E-1  | 1.0E0     | 1.0E2 |
| <input type="checkbox"/> | GOTERM_BP_FAT  | <a href="#">hemopoietic or lymphoid organ development</a>                  | RT |  | 5     | 8.0E-1  | 1.0E0     | 1.0E2 |
| <input type="checkbox"/> | GOTERM_BP_FAT  | <a href="#">immune system development</a>                                  | RT |  | 5     | 8.3E-1  | 1.0E0     | 1.0E2 |

| Annotation Cluster 1     |                 | Enrichment Score: 6.89                                                                                       | <b>G</b>           |     | Count | P_Value | Benjamini | FDR   |
|--------------------------|-----------------|--------------------------------------------------------------------------------------------------------------|--------------------|---------------------------------------------------------------------------------------|-------|---------|-----------|-------|
| Annotation Cluster 102   |                 | Enrichment Score: 0.1                                                                                        | <b>G</b>           |    | Count | P_Value | Benjamini | FDR   |
| <input type="checkbox"/> | GOTERM_BP_FAT   | <a href="#">positive regulation of nucleobase, nucleoside, nucleotide and nucleic acid metabolic process</a> | <a href="#">RT</a> |      | 13    | 6.6E-1  | 1.0E0     | 1.0E2 |
| <input type="checkbox"/> | GOTERM_BP_FAT   | <a href="#">positive regulation of transcription, DNA-dependent</a>                                          | <a href="#">RT</a> |      | 9     | 7.9E-1  | 1.0E0     | 1.0E2 |
| <input type="checkbox"/> | GOTERM_BP_FAT   | <a href="#">positive regulation of transcription from RNA polymerase II promoter</a>                         | <a href="#">RT</a> |      | 7     | 7.9E-1  | 1.0E0     | 1.0E2 |
| <input type="checkbox"/> | GOTERM_BP_FAT   | <a href="#">positive regulation of RNA metabolic process</a>                                                 | <a href="#">RT</a> |      | 9     | 7.9E-1  | 1.0E0     | 1.0E2 |
| <input type="checkbox"/> | GOTERM_BP_FAT   | <a href="#">positive regulation of transcription</a>                                                         | <a href="#">RT</a> |      | 10    | 8.4E-1  | 1.0E0     | 1.0E2 |
| <input type="checkbox"/> | GOTERM_BP_FAT   | <a href="#">positive regulation of gene expression</a>                                                       | <a href="#">RT</a> |      | 10    | 8.6E-1  | 1.0E0     | 1.0E2 |
| Annotation Cluster 103   |                 | Enrichment Score: 0.1                                                                                        | <b>G</b>           |    | Count | P_Value | Benjamini | FDR   |
| <input type="checkbox"/> | INTERPRO        | <a href="#">Leucine-rich repeat, typical subtype</a>                                                         | <a href="#">RT</a> |      | 3     | 7.5E-1  | 1.0E0     | 1.0E2 |
| <input type="checkbox"/> | SMART           | <a href="#">LRR_TYP</a>                                                                                      | <a href="#">RT</a> |      | 3     | 8.0E-1  | 1.0E0     | 1.0E2 |
| <input type="checkbox"/> | INTERPRO        | <a href="#">Leucine-rich repeat</a>                                                                          | <a href="#">RT</a> |      | 4     | 8.1E-1  | 1.0E0     | 1.0E2 |
| Annotation Cluster 104   |                 | Enrichment Score: 0.1                                                                                        | <b>G</b>           |    | Count | P_Value | Benjamini | FDR   |
| <input type="checkbox"/> | GOTERM_MF_FAT   | <a href="#">voltage-gated channel activity</a>                                                               | <a href="#">RT</a> |      | 4     | 7.5E-1  | 1.0E0     | 1.0E2 |
| <input type="checkbox"/> | GOTERM_MF_FAT   | <a href="#">voltage-gated ion channel activity</a>                                                           | <a href="#">RT</a> |      | 4     | 7.5E-1  | 1.0E0     | 1.0E2 |
| <input type="checkbox"/> | GOTERM_MF_FAT   | <a href="#">voltage-gated cation channel activity</a>                                                        | <a href="#">RT</a> |      | 3     | 7.9E-1  | 1.0E0     | 1.0E2 |
| <input type="checkbox"/> | SP_PIR_KEYWORDS | <a href="#">voltage-gated channel</a>                                                                        | <a href="#">RT</a> |      | 3     | 8.0E-1  | 1.0E0     | 1.0E2 |
| <input type="checkbox"/> | GOTERM_MF_FAT   | <a href="#">alkali metal ion binding</a>                                                                     | <a href="#">RT</a> |      | 3     | 9.4E-1  | 1.0E0     | 1.0E2 |
| Annotation Cluster 105   |                 | Enrichment Score: 0.07                                                                                       | <b>G</b>           |    | Count | P_Value | Benjamini | FDR   |
| <input type="checkbox"/> | SP_PIR_KEYWORDS | <a href="#">ionic channel</a>                                                                                | <a href="#">RT</a> |      | 6     | 7.5E-1  | 9.9E-1    | 1.0E2 |
| <input type="checkbox"/> | GOTERM_MF_FAT   | <a href="#">metal ion transmembrane transporter activity</a>                                                 | <a href="#">RT</a> |      | 6     | 7.8E-1  | 1.0E0     | 1.0E2 |
| <input type="checkbox"/> | GOTERM_MF_FAT   | <a href="#">cation channel activity</a>                                                                      | <a href="#">RT</a> |      | 5     | 8.0E-1  | 1.0E0     | 1.0E2 |
| <input type="checkbox"/> | GOTERM_MF_FAT   | <a href="#">gated channel activity</a>                                                                       | <a href="#">RT</a> |     | 5     | 8.7E-1  | 1.0E0     | 1.0E2 |
| <input type="checkbox"/> | GOTERM_MF_FAT   | <a href="#">ion channel activity</a>                                                                         | <a href="#">RT</a> |    | 6     | 8.8E-1  | 1.0E0     | 1.0E2 |
| <input type="checkbox"/> | GOTERM_MF_FAT   | <a href="#">substrate specific channel activity</a>                                                          | <a href="#">RT</a> |    | 6     | 9.0E-1  | 1.0E0     | 1.0E2 |
| <input type="checkbox"/> | GOTERM_MF_FAT   | <a href="#">channel activity</a>                                                                             | <a href="#">RT</a> |    | 6     | 9.1E-1  | 1.0E0     | 1.0E2 |
| <input type="checkbox"/> | GOTERM_MF_FAT   | <a href="#">passive transmembrane transporter activity</a>                                                   | <a href="#">RT</a> |    | 6     | 9.2E-1  | 1.0E0     | 1.0E2 |
| Annotation Cluster 106   |                 | Enrichment Score: 0.07                                                                                       | <b>G</b>           |  | Count | P_Value | Benjamini | FDR   |
| <input type="checkbox"/> | UP_SEQ_FEATURE  | domain:KRAB                                                                                                  | <a href="#">RT</a> |    | 6     | 7.9E-1  | 1.0E0     | 1.0E2 |
| <input type="checkbox"/> | INTERPRO        | <a href="#">Krueppel-associated box</a>                                                                      | <a href="#">RT</a> |    | 6     | 8.5E-1  | 1.0E0     | 1.0E2 |
| <input type="checkbox"/> | SMART           | <a href="#">KRAB</a>                                                                                         | <a href="#">RT</a> |    | 6     | 9.1E-1  | 1.0E0     | 1.0E2 |
| Annotation Cluster 107   |                 | Enrichment Score: 0.07                                                                                       | <b>G</b>           |  | Count | P_Value | Benjamini | FDR   |
| <input type="checkbox"/> | INTERPRO        | <a href="#">EGF</a>                                                                                          | <a href="#">RT</a> |    | 3     | 7.3E-1  | 1.0E0     | 1.0E2 |
| <input type="checkbox"/> | INTERPRO        | <a href="#">EGF-like, type 3</a>                                                                             | <a href="#">RT</a> |    | 4     | 7.6E-1  | 1.0E0     | 1.0E2 |
| <input type="checkbox"/> | SP_PIR_KEYWORDS | <a href="#">egf-like domain</a>                                                                              | <a href="#">RT</a> |    | 4     | 8.3E-1  | 1.0E0     | 1.0E2 |
| <input type="checkbox"/> | INTERPRO        | <a href="#">EGF-like</a>                                                                                     | <a href="#">RT</a> |    | 3     | 9.2E-1  | 1.0E0     | 1.0E2 |
| <input type="checkbox"/> | INTERPRO        | <a href="#">EGF-like region, conserved site</a>                                                              | <a href="#">RT</a> |    | 4     | 9.4E-1  | 1.0E0     | 1.0E2 |
| <input type="checkbox"/> | SMART           | <a href="#">EGF</a>                                                                                          | <a href="#">RT</a> |    | 3     | 9.5E-1  | 1.0E0     | 1.0E2 |
| Annotation Cluster 108   |                 | Enrichment Score: 0.07                                                                                       | <b>G</b>           |  | Count | P_Value | Benjamini | FDR   |
| <input type="checkbox"/> | GOTERM_BP_FAT   | <a href="#">nuclear division</a>                                                                             | <a href="#">RT</a> |    | 4     | 8.4E-1  | 1.0E0     | 1.0E2 |
| <input type="checkbox"/> | GOTERM_BP_FAT   | <a href="#">mitosis</a>                                                                                      | <a href="#">RT</a> |    | 4     | 8.4E-1  | 1.0E0     | 1.0E2 |
| <input type="checkbox"/> | GOTERM_BP_FAT   | <a href="#">M phase of mitotic cell cycle</a>                                                                | <a href="#">RT</a> |    | 4     | 8.5E-1  | 1.0E0     | 1.0E2 |
| <input type="checkbox"/> | GOTERM_BP_FAT   | <a href="#">organelle fission</a>                                                                            | <a href="#">RT</a> |    | 4     | 8.6E-1  | 1.0E0     | 1.0E2 |
| <input type="checkbox"/> | SP_PIR_KEYWORDS | <a href="#">mitosis</a>                                                                                      | <a href="#">RT</a> |    | 3     | 8.8E-1  | 1.0E0     | 1.0E2 |
| Annotation Cluster 109   |                 | Enrichment Score: 0.06                                                                                       | <b>G</b>           |  | Count | P_Value | Benjamini | FDR   |
| <input type="checkbox"/> | UP_SEQ_FEATURE  | zinc finger region:C2H2-type 8                                                                               | <a href="#">RT</a> |    | 7     | 8.4E-1  | 1.0E0     | 1.0E2 |
| <input type="checkbox"/> | UP_SEQ_FEATURE  | zinc finger region:C2H2-type 6                                                                               | <a href="#">RT</a> |    | 8     | 8.5E-1  | 1.0E0     | 1.0E2 |
| <input type="checkbox"/> | UP_SEQ_FEATURE  | zinc finger region:C2H2-type 9                                                                               | <a href="#">RT</a> |    | 6     | 8.7E-1  | 1.0E0     | 1.0E2 |
| <input type="checkbox"/> | UP_SEQ_FEATURE  | zinc finger region:C2H2-type 7                                                                               | <a href="#">RT</a> |    | 7     | 8.9E-1  | 1.0E0     | 1.0E2 |
| Annotation Cluster 110   |                 | Enrichment Score: 0.06                                                                                       | <b>G</b>           |  | Count | P_Value | Benjamini | FDR   |
| <input type="checkbox"/> | GOTERM_BP_FAT   | <a href="#">male gamete generation</a>                                                                       | <a href="#">RT</a> |    | 6     | 7.8E-1  | 1.0E0     | 1.0E2 |
| <input type="checkbox"/> | GOTERM_BP_FAT   | <a href="#">spermatogenesis</a>                                                                              | <a href="#">RT</a> |    | 6     | 7.8E-1  | 1.0E0     | 1.0E2 |
| <input type="checkbox"/> | GOTERM_BP_FAT   | <a href="#">gamete generation</a>                                                                            | <a href="#">RT</a> |    | 6     | 9.2E-1  | 1.0E0     | 1.0E2 |

| Annotation Cluster 1     |                 | Enrichment Score: 6.89                                                    | <b>G</b> |  | Count | P_Value | Benjamini | FDR   |
|--------------------------|-----------------|---------------------------------------------------------------------------|----------|--|-------|---------|-----------|-------|
| <input type="checkbox"/> | GOTERM_BP_FAT   | <a href="#">sexual reproduction</a>                                       | RT       |  | 7     | 9.2E-1  | 1.0E0     | 1.0E2 |
| <input type="checkbox"/> | GOTERM_BP_FAT   | <a href="#">multicellular organism reproduction</a>                       | RT       |  | 7     | 9.4E-1  | 1.0E0     | 1.0E2 |
| <input type="checkbox"/> | GOTERM_BP_FAT   | <a href="#">reproductive process in a multicellular organism</a>          | RT       |  | 7     | 9.4E-1  | 1.0E0     | 1.0E2 |
| Annotation Cluster 111   |                 | Enrichment Score: 0.05                                                    | <b>G</b> |  | Count | P_Value | Benjamini | FDR   |
| <input type="checkbox"/> | GOTERM_BP_FAT   | <a href="#">response to nutrient</a>                                      | RT       |  | 3     | 7.9E-1  | 1.0E0     | 1.0E2 |
| <input type="checkbox"/> | GOTERM_BP_FAT   | <a href="#">response to nutrient levels</a>                               | RT       |  | 3     | 9.2E-1  | 1.0E0     | 1.0E2 |
| <input type="checkbox"/> | GOTERM_BP_FAT   | <a href="#">response to extracellular stimulus</a>                        | RT       |  | 3     | 9.5E-1  | 1.0E0     | 1.0E2 |
| Annotation Cluster 112   |                 | Enrichment Score: 0.05                                                    | <b>G</b> |  | Count | P_Value | Benjamini | FDR   |
| <input type="checkbox"/> | GOTERM_BP_FAT   | <a href="#">positive regulation of kinase activity</a>                    | RT       |  | 4     | 8.7E-1  | 1.0E0     | 1.0E2 |
| <input type="checkbox"/> | GOTERM_BP_FAT   | <a href="#">positive regulation of transferase activity</a>               | RT       |  | 4     | 8.8E-1  | 1.0E0     | 1.0E2 |
| <input type="checkbox"/> | GOTERM_BP_FAT   | <a href="#">positive regulation of protein kinase activity</a>            | RT       |  | 3     | 9.5E-1  | 1.0E0     | 1.0E2 |
| Annotation Cluster 113   |                 | Enrichment Score: 0.04                                                    | <b>G</b> |  | Count | P_Value | Benjamini | FDR   |
| <input type="checkbox"/> | UP_SEQ_FEATURE  | domain:PH                                                                 | RT       |  | 4     | 8.5E-1  | 1.0E0     | 1.0E2 |
| <input type="checkbox"/> | INTERPRO        | <a href="#">Pleckstrin homology</a>                                       | RT       |  | 4     | 9.2E-1  | 1.0E0     | 1.0E2 |
| <input type="checkbox"/> | SMART           | <a href="#">PH</a>                                                        | RT       |  | 4     | 9.5E-1  | 1.0E0     | 1.0E2 |
| Annotation Cluster 114   |                 | Enrichment Score: 0.04                                                    | <b>G</b> |  | Count | P_Value | Benjamini | FDR   |
| <input type="checkbox"/> | GOTERM_BP_FAT   | <a href="#">visual perception</a>                                         | RT       |  | 4     | 8.3E-1  | 1.0E0     | 1.0E2 |
| <input type="checkbox"/> | GOTERM_BP_FAT   | <a href="#">sensory perception of light stimulus</a>                      | RT       |  | 4     | 8.3E-1  | 1.0E0     | 1.0E2 |
| <input type="checkbox"/> | SP_PIR_KEYWORDS | <a href="#">sensory transduction</a>                                      | RT       |  | 3     | 1.0E0   | 1.0E0     | 1.0E2 |
| <input type="checkbox"/> | GOTERM_BP_FAT   | <a href="#">sensory perception</a>                                        | RT       |  | 5     | 1.0E0   | 1.0E0     | 1.0E2 |
| Annotation Cluster 115   |                 | Enrichment Score: 0.04                                                    | <b>G</b> |  | Count | P_Value | Benjamini | FDR   |
| <input type="checkbox"/> | GOTERM_BP_FAT   | <a href="#">positive regulation of protein metabolic process</a>          | RT       |  | 4     | 8.9E-1  | 1.0E0     | 1.0E2 |
| <input type="checkbox"/> | GOTERM_BP_FAT   | <a href="#">positive regulation of protein modification process</a>       | RT       |  | 3     | 9.1E-1  | 1.0E0     | 1.0E2 |
| <input type="checkbox"/> | GOTERM_BP_FAT   | <a href="#">positive regulation of cellular protein metabolic process</a> | RT       |  | 3     | 9.6E-1  | 1.0E0     | 1.0E2 |
| Annotation Cluster 116   |                 | Enrichment Score: 0.04                                                    | <b>G</b> |  | Count | P_Value | Benjamini | FDR   |
| <input type="checkbox"/> | INTERPRO        | <a href="#">Immunoglobulin</a>                                            | RT       |  | 4     | 7.8E-1  | 1.0E0     | 1.0E2 |
| <input type="checkbox"/> | INTERPRO        | <a href="#">Immunoglobulin subtype</a>                                    | RT       |  | 3     | 9.9E-1  | 1.0E0     | 1.0E2 |
| <input type="checkbox"/> | SMART           | <a href="#">IG</a>                                                        | RT       |  | 3     | 1.0E0   | 1.0E0     | 1.0E2 |
| Annotation Cluster 117   |                 | Enrichment Score: 0.03                                                    | <b>G</b> |  | Count | P_Value | Benjamini | FDR   |
| <input type="checkbox"/> | SP_PIR_KEYWORDS | <a href="#">sh3 domain</a>                                                | RT       |  | 3     | 9.2E-1  | 1.0E0     | 1.0E2 |
| <input type="checkbox"/> | INTERPRO        | <a href="#">Src homology-3 domain</a>                                     | RT       |  | 3     | 9.3E-1  | 1.0E0     | 1.0E2 |
| <input type="checkbox"/> | SMART           | <a href="#">SH3</a>                                                       | RT       |  | 3     | 9.6E-1  | 1.0E0     | 1.0E2 |
| Annotation Cluster 118   |                 | Enrichment Score: 0                                                       | <b>G</b> |  | Count | P_Value | Benjamini | FDR   |
| <input type="checkbox"/> | GOTERM_CC_FAT   | <a href="#">intrinsic to membrane</a>                                     | RT       |  | 82    | 1.0E0   | 1.0E0     | 1.0E2 |
| <input type="checkbox"/> | GOTERM_CC_FAT   | <a href="#">integral to membrane</a>                                      | RT       |  | 77    | 1.0E0   | 1.0E0     | 1.0E2 |
| <input type="checkbox"/> | SP_PIR_KEYWORDS | <a href="#">transmembrane</a>                                             | RT       |  | 71    | 1.0E0   | 1.0E0     | 1.0E2 |
| <input type="checkbox"/> | UP_SEQ_FEATURE  | transmembrane region                                                      | RT       |  | 70    | 1.0E0   | 1.0E0     | 1.0E2 |

609 terms were not clustered.

Please cite [Nature Protocols 2009; 4\(1\):44 & Genome Biology 2003; 4\(5\):P3](#) within any publication that makes use of any methods inspired by DAVID.

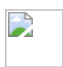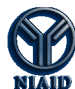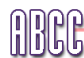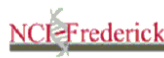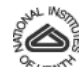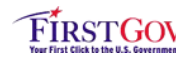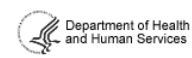

[Term of Service](#) | [Contact Us](#) | [Site Map](#)

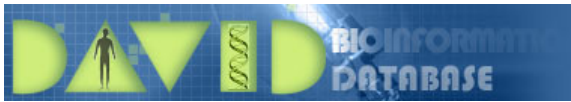

## Gene Report

[Help and Manual](#)
[Download File](#)
**44 record(s)**

| ID                                                                                                                | GENE NAME                                                                                                                         | Related Genes      | Species                      |
|-------------------------------------------------------------------------------------------------------------------|-----------------------------------------------------------------------------------------------------------------------------------|--------------------|------------------------------|
| ADAM metallopeptidase domain 19 (meltrin beta)                                                                    | <a href="#">ADAM metallopeptidase domain 19 (meltrin beta)</a>                                                                    | <a href="#">RG</a> | <a href="#">Homo sapiens</a> |
| BRCA1 associated RING domain 1                                                                                    | <a href="#">BRCA1 associated RING domain 1</a>                                                                                    | <a href="#">RG</a> | <a href="#">Homo sapiens</a> |
| Cas-Br-M (murine) ecotropic retroviral transforming sequence-like 1                                               | <a href="#">Cas-Br-M (murine) ecotropic retroviral transforming sequence-like 1</a>                                               | <a href="#">RG</a> | <a href="#">Homo sapiens</a> |
| F-box and WD repeat domain containing 4                                                                           | <a href="#">F-box and WD repeat domain containing 4</a>                                                                           | <a href="#">RG</a> | <a href="#">Homo sapiens</a> |
| F-box and leucine-rich repeat protein 3                                                                           | <a href="#">F-box and leucine-rich repeat protein 3</a>                                                                           | <a href="#">RG</a> | <a href="#">Homo sapiens</a> |
| F-box protein 34                                                                                                  | <a href="#">F-box protein 34</a>                                                                                                  | <a href="#">RG</a> | <a href="#">Homo sapiens</a> |
| F-box protein 38                                                                                                  | <a href="#">F-box protein 38</a>                                                                                                  | <a href="#">RG</a> | <a href="#">Homo sapiens</a> |
| F-box protein 9                                                                                                   | <a href="#">F-box protein 9</a>                                                                                                   | <a href="#">RG</a> | <a href="#">Homo sapiens</a> |
| LON peptidase N-terminal domain and ring finger 2                                                                 | <a href="#">LON peptidase N-terminal domain and ring finger 2</a>                                                                 | <a href="#">RG</a> | <a href="#">Homo sapiens</a> |
| PEST proteolytic signal containing nuclear protein                                                                | <a href="#">PEST proteolytic signal containing nuclear protein</a>                                                                | <a href="#">RG</a> | <a href="#">Homo sapiens</a> |
| RAD23 homolog A (S. cerevisiae)                                                                                   | <a href="#">RAD23 homolog A (S. cerevisiae)</a>                                                                                   | <a href="#">RG</a> | <a href="#">Homo sapiens</a> |
| UBX domain protein 1                                                                                              | <a href="#">UBX domain protein 1</a>                                                                                              | <a href="#">RG</a> | <a href="#">Homo sapiens</a> |
| ancient ubiquitous protein 1                                                                                      | <a href="#">ancient ubiquitous protein 1</a>                                                                                      | <a href="#">RG</a> | <a href="#">Homo sapiens</a> |
| ankyrin repeat and SOCS box-containing 11                                                                         | <a href="#">ankyrin repeat and SOCS box-containing 11</a>                                                                         | <a href="#">RG</a> | <a href="#">Homo sapiens</a> |
| ankyrin repeat and SOCS box-containing 15                                                                         | <a href="#">ankyrin repeat and SOCS box-containing 15</a>                                                                         | <a href="#">RG</a> | <a href="#">Homo sapiens</a> |
| ankyrin repeat and SOCS box-containing 2                                                                          | <a href="#">ankyrin repeat and SOCS box-containing 2</a>                                                                          | <a href="#">RG</a> | <a href="#">Homo sapiens</a> |
| ankyrin repeat and SOCS box-containing 3                                                                          | <a href="#">ankyrin repeat and SOCS box-containing 3</a>                                                                          | <a href="#">RG</a> | <a href="#">Homo sapiens</a> |
| autocrine motility factor receptor calpain 3, (p94)                                                               | <a href="#">autocrine motility factor receptor calpain 3, (p94)</a>                                                               | <a href="#">RG</a> | <a href="#">Homo sapiens</a> |
| caspase 7, apoptosis-related cysteine peptidase                                                                   | <a href="#">caspase 7, apoptosis-related cysteine peptidase</a>                                                                   | <a href="#">RG</a> | <a href="#">Homo sapiens</a> |
| cell division cycle 16 homolog (S. cerevisiae)                                                                    | <a href="#">cell division cycle 16 homolog (S. cerevisiae)</a>                                                                    | <a href="#">RG</a> | <a href="#">Homo sapiens</a> |
| chromobox homolog 4 (Pc class homolog, Drosophila)                                                                | <a href="#">chromobox homolog 4 (Pc class homolog, Drosophila)</a>                                                                | <a href="#">RG</a> | <a href="#">Homo sapiens</a> |
| complement factor H                                                                                               | <a href="#">complement factor H</a>                                                                                               | <a href="#">RG</a> | <a href="#">Homo sapiens</a> |
| cytokine inducible SH2-containing protein                                                                         | <a href="#">cytokine inducible SH2-containing protein</a>                                                                         | <a href="#">RG</a> | <a href="#">Homo sapiens</a> |
| fem-1 homolog b (C. elegans)                                                                                      | <a href="#">fem-1 homolog b (C. elegans)</a>                                                                                      | <a href="#">RG</a> | <a href="#">Homo sapiens</a> |
| hect domain and RLD 2                                                                                             | <a href="#">hect domain and RLD 2</a>                                                                                             | <a href="#">RG</a> | <a href="#">Homo sapiens</a> |
| lysine (K)-specific demethylase 2B                                                                                | <a href="#">lysine (K)-specific demethylase 2B</a>                                                                                | <a href="#">RG</a> | <a href="#">Homo sapiens</a> |
| membrane-associated ring finger (C3HC4) 5                                                                         | <a href="#">membrane-associated ring finger (C3HC4) 5</a>                                                                         | <a href="#">RG</a> | <a href="#">Homo sapiens</a> |
| membrane-associated ring finger (C3HC4) 7                                                                         | <a href="#">membrane-associated ring finger (C3HC4) 7</a>                                                                         | <a href="#">RG</a> | <a href="#">Homo sapiens</a> |
| potassium channel modulatory factor 1                                                                             | <a href="#">potassium channel modulatory factor 1</a>                                                                             | <a href="#">RG</a> | <a href="#">Homo sapiens</a> |
| ribonuclease H1                                                                                                   | <a href="#">ribonuclease H1</a>                                                                                                   | <a href="#">RG</a> | <a href="#">Homo sapiens</a> |
| ring finger protein 216                                                                                           | <a href="#">ring finger protein 216</a>                                                                                           | <a href="#">RG</a> | <a href="#">Homo sapiens</a> |
| seven in absentia homolog 1 (Drosophila)                                                                          | <a href="#">seven in absentia homolog 1 (Drosophila)</a>                                                                          | <a href="#">RG</a> | <a href="#">Homo sapiens</a> |
| signal peptidase complex subunit 2 homolog (S. cerevisiae); signal peptidase complex subunit 2 homolog pseudogene | <a href="#">signal peptidase complex subunit 2 homolog (S. cerevisiae); signal peptidase complex subunit 2 homolog pseudogene</a> | <a href="#">RG</a> | <a href="#">Homo sapiens</a> |
| similar to ribonucleic acid binding protein S1; RNA binding protein S1, serine-rich domain                        | <a href="#">similar to ribonucleic acid binding protein S1; RNA binding protein S1, serine-rich domain</a>                        | <a href="#">RG</a> | <a href="#">Homo sapiens</a> |
| ubiquitin D                                                                                                       | <a href="#">ubiquitin D</a>                                                                                                       | <a href="#">RG</a> | <a href="#">Homo sapiens</a> |
| ubiquitin protein ligase E3 component n-recogin 3 (putative)                                                      | <a href="#">ubiquitin protein ligase E3 component n-recogin 3 (putative)</a>                                                      | <a href="#">RG</a> | <a href="#">Homo sapiens</a> |
| ubiquitin specific peptidase 24                                                                                   | <a href="#">ubiquitin specific peptidase 24</a>                                                                                   | <a href="#">RG</a> | <a href="#">Homo sapiens</a> |
| ubiquitin specific peptidase 49                                                                                   | <a href="#">ubiquitin specific peptidase 49</a>                                                                                   | <a href="#">RG</a> | <a href="#">Homo sapiens</a> |



| ID                                                                                                                                                                  | GENE NAME                                                                                                                                                                           | Related Genes      | Species                      |
|---------------------------------------------------------------------------------------------------------------------------------------------------------------------|-------------------------------------------------------------------------------------------------------------------------------------------------------------------------------------|--------------------|------------------------------|
| ubiquitin specific peptidase 53                                                                                                                                     | <a href="#">ubiquitin specific peptidase 53</a>                                                                                                                                     | <a href="#">RG</a> | <a href="#">Homo sapiens</a> |
| ubiquitin-conjugating enzyme E2 variant 1; ubiquitin-conjugating enzyme E2 variant 1 pseudogene 2; transmembrane protein 189; TMEM189-UBE2V1 readthrough transcript | <a href="#">ubiquitin-conjugating enzyme E2 variant 1; ubiquitin-conjugating enzyme E2 variant 1 pseudogene 2; transmembrane protein 189; TMEM189-UBE2V1 readthrough transcript</a> | <a href="#">RG</a> | <a href="#">Homo sapiens</a> |
| ubiquitin-conjugating enzyme E2G 1 (UBC7 homolog, yeast)                                                                                                            | <a href="#">ubiquitin-conjugating enzyme E2G 1 (UBC7 homolog, yeast)</a>                                                                                                            | <a href="#">RG</a> | <a href="#">Homo sapiens</a> |
| ubiquitin-conjugating enzyme E2L 6                                                                                                                                  | <a href="#">ubiquitin-conjugating enzyme E2L 6</a>                                                                                                                                  | <a href="#">RG</a> | <a href="#">Homo sapiens</a> |
| v-rel reticuloendotheliosis viral oncogene homolog A (avian)                                                                                                        | <a href="#">v-rel reticuloendotheliosis viral oncogene homolog A (avian)</a>                                                                                                        | <a href="#">RG</a> | <a href="#">Homo sapiens</a> |

Please cite [Nature Protocols 2009; 4\(1\):44 & Genome Biology 2003; 4\(5\):P3](#) within any publication that makes use of any methods inspired by DAVID.

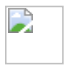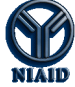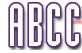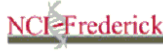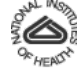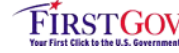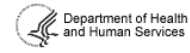

[Term of Service](#) | [Contact Us](#) | [Site Map](#)

|  |                                                                                                                                           |
|--|-------------------------------------------------------------------------------------------------------------------------------------------|
|  | LON peptidase N-terminal domain and ring finger 2                                                                                         |
|  | caspase 7, apoptosis-related cysteine peptidase                                                                                           |
|  | calpain 3, (p94)                                                                                                                          |
|  | complement factor H                                                                                                                       |
|  | signal peptidase complex subunit 2 homolog ( <i>S. cerevisiae</i> ); signal peptidase complex subunit 2 homolog pseudogene                |
|  | ribonuclease H1                                                                                                                           |
|  | similar to ribonucleic acid binding protein S1; RNA binding protein S1, serine-rich domain                                                |
|  | ADAM metallopeptidase domain 19 (meltrin beta)                                                                                            |
|  | v-rel reticuloendotheliosis viral oncogene homolog A (avian)                                                                              |
|  | RAD23 homolog A ( <i>S. cerevisiae</i> )                                                                                                  |
|  | ubiquitin specific peptidase 53                                                                                                           |
|  | PEST proteolytic signal containing nuclear protein                                                                                        |
|  | UBX domain protein 1                                                                                                                      |
|  | hect domain and RLD 2                                                                                                                     |
|  | fem-1 homolog b ( <i>C. elegans</i> )                                                                                                     |
|  | potassium channel modulatory factor 1                                                                                                     |
|  | ring finger protein 216                                                                                                                   |
|  | seven in absentia homolog 1 ( <i>Drosophila</i> )                                                                                         |
|  | ankyrin repeat and SOCS box-containing 11                                                                                                 |
|  | ubiquitin-conjugating enzyme E2G 1 (UBC7 homolog, yeast)                                                                                  |
|  | cell division cycle 16 homolog ( <i>S. cerevisiae</i> )                                                                                   |
|  | F-box protein 9                                                                                                                           |
|  | F-box protein 38                                                                                                                          |
|  | ankyrin repeat and SOCS box-containing 15                                                                                                 |
|  | ubiquitin D                                                                                                                               |
|  | membrane-associated ring finger (C3HC4) 7                                                                                                 |
|  | ankyrin repeat and SOCS box-containing 2                                                                                                  |
|  | ancient ubiquitous protein 1                                                                                                              |
|  | membrane-associated ring finger (C3HC4) 5                                                                                                 |
|  | autocrine motility factor receptor                                                                                                        |
|  | ubiquitin specific peptidase 24                                                                                                           |
|  | ankyrin repeat and SOCS box-containing 3                                                                                                  |
|  | ubiquitin specific peptidase 49                                                                                                           |
|  | chromobox homolog 4 (Pc class homolog, <i>Drosophila</i> )                                                                                |
|  | cytokine inducible SH2-containing protein                                                                                                 |
|  | lysine (K)-specific demethylase 2B                                                                                                        |
|  | ubiquitin protein ligase E3 component n-recogin 3 (putative)                                                                              |
|  | F-box and leucine-rich repeat protein 3                                                                                                   |
|  | F-box protein 34                                                                                                                          |
|  | BRCA1 associated RING domain 1                                                                                                            |
|  | F-box and WD repeat domain containing 4                                                                                                   |
|  | ubiquitin-conjugating enzyme E2L 6                                                                                                        |
|  | ubiquitin-conjugating enzyme E2 variant 1; ubiquitin-conjugating enzyme E2 variant 1 pseudogene 2; transmembrane protein 189; TMEM189-UBE |
|  | Cas-Br-M (murine) ecotropic retroviral transforming sequence-like 1                                                                       |

ub1 conjugation pathway  
 GO:0019941-modification-dependent protein catabolic process  
 GO:0043632-modification-dependent macromolecule catabolic process  
 GO:0051603-proteolysis involved in cellular protein catabolic process  
 GO:0044257~cellular protein catabolic process  
 GO:0030163~protein catabolic process  
 GO:0044265~cellular macromolecule catabolic process  
 GO:0009057~macromolecule catabolic process  
 GO:0065508~proteolysis

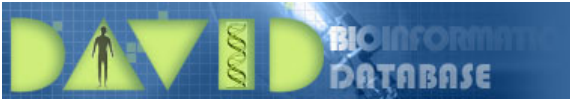

## Gene Report

[Help and Manual](#)

**Current Gene List: List\_2**

**Current Background: Homo sapiens**

**391 DAVID IDs**

**14 record(s)**

[Download File](#)

| ILLUMINA_ID  | GENE NAME                                                                                                                                                                           | Related Genes | Species                      |
|--------------|-------------------------------------------------------------------------------------------------------------------------------------------------------------------------------------|---------------|------------------------------|
| ILMN_1676241 | <a href="#">BCL6 co-repressor</a>                                                                                                                                                   | RG            | <a href="#">Homo sapiens</a> |
| ILMN_2074258 | <a href="#">BRCA1 associated RING domain 1</a>                                                                                                                                      | RG            | <a href="#">Homo sapiens</a> |
| ILMN_2073732 | <a href="#">Cas-Br-M (murine) ecotropic retroviral transforming sequence-like 1</a>                                                                                                 | RG            | <a href="#">Homo sapiens</a> |
| ILMN_1794187 | <a href="#">F-box and leucine-rich repeat protein 3</a>                                                                                                                             | RG            | <a href="#">Homo sapiens</a> |
| ILMN_1717063 | <a href="#">F-box protein 9</a>                                                                                                                                                     | RG            | <a href="#">Homo sapiens</a> |
| ILMN_1666258 | <a href="#">autocrine motility factor receptor</a>                                                                                                                                  | RG            | <a href="#">Homo sapiens</a> |
| ILMN_1744239 | <a href="#">fem-1 homolog b (C. elegans)</a>                                                                                                                                        | RG            | <a href="#">Homo sapiens</a> |
| ILMN_1813475 | <a href="#">hect domain and RLD 2</a>                                                                                                                                               | RG            | <a href="#">Homo sapiens</a> |
| ILMN_2380566 | <a href="#">seven in absentia homolog 1 (Drosophila)</a>                                                                                                                            | RG            | <a href="#">Homo sapiens</a> |
| ILMN_2197659 | <a href="#">solute carrier family 14 (urea transporter), member 1 (Kidd blood group)</a>                                                                                            | RG            | <a href="#">Homo sapiens</a> |
| ILMN_2171640 | <a href="#">ubiquitin protein liqase E3 component n-recogin 3 (putative)</a>                                                                                                        | RG            | <a href="#">Homo sapiens</a> |
| ILMN_2368713 | <a href="#">ubiquitin-conjugating enzyme E2 variant 1; ubiquitin-conjugating enzyme E2 variant 1 pseudogene 2; transmembrane protein 189; TMEM189-UBE2V1 readthrough transcript</a> | RG            | <a href="#">Homo sapiens</a> |
| ILMN_1814465 | <a href="#">ubiquitin-coniugating enzyme E2G 1 (UBC7 homolog, yeast)</a>                                                                                                            | RG            | <a href="#">Homo sapiens</a> |
| ILMN_1769520 | <a href="#">ubiquitin-conjugating enzyme E2L 6</a>                                                                                                                                  | RG            | <a href="#">Homo sapiens</a> |

Please cite [Nature Protocols 2009; 4\(1\):44](#) & [Genome Biology 2003; 4\(5\):P3](#) within any publication that makes use of any methods inspired by DAVID.

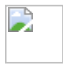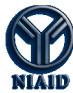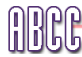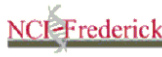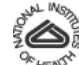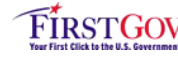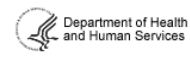

[Term of Service](#) | [Contact Us](#) | [Site Map](#)

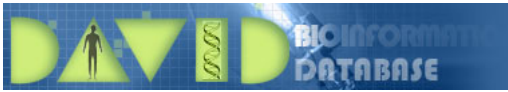

**\*\*\* Announcing DAVID 6.8 Beta with updated Knowledgebase ([more info](#)). You may explore the new version at [david-d.ncifcrf.gov](http://david-d.ncifcrf.gov). \*\*\* DAVID 6.8 w 6.7 will be available on our development site until at least January 15, 2017.**

## 2D View

[Help](#)

corresponding gene-term association positively reported  corresponding gene-term association not reported yet

[Download File](#)

|  |                                                                                                                                                          |
|--|----------------------------------------------------------------------------------------------------------------------------------------------------------|
|  | ubiquitin-conjugating enzyme E2 variant 1; ubiquitin-conjugating enzyme E2 variant 1 pseudogene 2; transmembrane protein 189; TMEM189-UBE2V1 readthrough |
|  | fem-1 homolog b (C. elegans)                                                                                                                             |
|  | hect domain and RLD 2                                                                                                                                    |
|  | Cas-Br-M (murine) ecotropic retroviral transforming sequence-like 1                                                                                      |
|  | autocrine motility factor receptor                                                                                                                       |
|  | seven in absentia homolog 1 (Drosophila)                                                                                                                 |
|  | ubiquitin-conjugating enzyme E2G 1 (UBC7 homolog, yeast)                                                                                                 |
|  | ubiquitin protein ligase E3 component n-recogin 3 (putative)                                                                                             |
|  | F-box protein 9                                                                                                                                          |
|  | F-box and leucine-rich repeat protein 3                                                                                                                  |
|  | BRCA1 associated RING domain 1                                                                                                                           |
|  | BCL6 co-repressor                                                                                                                                        |
|  | solute carrier family 14 (urea transporter), member 1 (Kidd blood group)                                                                                 |
|  | ubiquitin-conjugating enzyme E2L 6                                                                                                                       |

GO:0004842~ubiquitin-protein ligase activity  
 GO:0019787~small conjugating protein ligase activity  
 GO:0016881~acid-amino acid ligase activity  
 GO:0016879~ligase activity, forming carbon-nitrogen bonds



## Gene Report

[Help and Manual](#)

Current Gene List: List\_2

Current Background: Homo sapiens

391 DAVID IDs

56 record(s)

[Download File](#)

| ILLUMINA_ID                | GENE NAME                                                                                                                                                                                                                                                                            | Related Genes | Species                      |
|----------------------------|--------------------------------------------------------------------------------------------------------------------------------------------------------------------------------------------------------------------------------------------------------------------------------------|---------------|------------------------------|
| ILMN_1741572               | <a href="#">A kinase (PRKA) anchor protein 8</a>                                                                                                                                                                                                                                     | RG            | <a href="#">Homo sapiens</a> |
| ILMN_1797341               | <a href="#">AT rich interactive domain 1A (SWI-like)</a>                                                                                                                                                                                                                             | RG            | <a href="#">Homo sapiens</a> |
| ILMN_2278235               | <a href="#">C-terminal binding protein 1</a>                                                                                                                                                                                                                                         | RG            | <a href="#">Homo sapiens</a> |
| ILMN_1746257               | <a href="#">DAZ associated protein 1</a>                                                                                                                                                                                                                                             | RG            | <a href="#">Homo sapiens</a> |
| ILMN_1735461               | <a href="#">DEAD (Asp-Glu-Ala-Asp) box polypeptide 21</a>                                                                                                                                                                                                                            | RG            | <a href="#">Homo sapiens</a> |
| ILMN_1795218               | <a href="#">DEAH (Asp-Glu-Ala-His) box polypeptide 30</a>                                                                                                                                                                                                                            | RG            | <a href="#">Homo sapiens</a> |
| ILMN_1761828               | <a href="#">E2F transcription factor 4, p107/p130-binding</a>                                                                                                                                                                                                                        | RG            | <a href="#">Homo sapiens</a> |
| ILMN_1768127               | <a href="#">EBNA1 binding protein 2</a>                                                                                                                                                                                                                                              | RG            | <a href="#">Homo sapiens</a> |
| ILMN_1674024               | <a href="#">IKAROS family zinc finger 5 (Pegasus)</a>                                                                                                                                                                                                                                | RG            | <a href="#">Homo sapiens</a> |
| ILMN_1709483               | <a href="#">MRE11 meiotic recombination 11 homolog A (S. cerevisiae)</a>                                                                                                                                                                                                             | RG            | <a href="#">Homo sapiens</a> |
| ILMN_2322986               | <a href="#">MYC induced nuclear antigen</a>                                                                                                                                                                                                                                          | RG            | <a href="#">Homo sapiens</a> |
| ILMN_2363027               | <a href="#">RAD51 homolog (RecA homolog, E. coli) (S. cerevisiae)</a>                                                                                                                                                                                                                | RG            | <a href="#">Homo sapiens</a> |
| ILMN_2158336               | <a href="#">SH3-domain GRB2-like endophilin B2</a>                                                                                                                                                                                                                                   | RG            | <a href="#">Homo sapiens</a> |
| ILMN_1678729               | <a href="#">SIL1 homolog, endoplasmic reticulum chaperone (S. cerevisiae)</a>                                                                                                                                                                                                        | RG            | <a href="#">Homo sapiens</a> |
| ILMN_1703427               | <a href="#">SON DNA binding protein</a>                                                                                                                                                                                                                                              | RG            | <a href="#">Homo sapiens</a> |
| ILMN_1737535               | <a href="#">TAF4 RNA polymerase II, TATA box binding protein (TBP)-associated factor, 135kDa</a>                                                                                                                                                                                     | RG            | <a href="#">Homo sapiens</a> |
| ILMN_1697420               | <a href="#">TERF1 (TRF1)-interacting nuclear factor 2</a>                                                                                                                                                                                                                            | RG            | <a href="#">Homo sapiens</a> |
| ILMN_1711566               | <a href="#">TIMP metalloproteinase inhibitor 1</a>                                                                                                                                                                                                                                   | RG            | <a href="#">Homo sapiens</a> |
| ILMN_2130838               | <a href="#">UTP11-like, U3 small nucleolar ribonucleoprotein, (yeast)</a>                                                                                                                                                                                                            | RG            | <a href="#">Homo sapiens</a> |
| ILMN_2105983               | <a href="#">X-ray repair complementing defective repair in Chinese hamster cells 5 (double-strand-break rejoining)</a>                                                                                                                                                               | RG            | <a href="#">Homo sapiens</a> |
| ILMN_1670878               | <a href="#">YTH domain containing 1</a>                                                                                                                                                                                                                                              | RG            | <a href="#">Homo sapiens</a> |
| ILMN_1770892               | <a href="#">YY1 transcription factor</a>                                                                                                                                                                                                                                             | RG            | <a href="#">Homo sapiens</a> |
| ILMN_1679797               | <a href="#">adenosine deaminase, RNA-specific, B1 (RED1 homolog rat)</a>                                                                                                                                                                                                             | RG            | <a href="#">Homo sapiens</a> |
| ILMN_1666385               | <a href="#">calmodulin 3 (phosphorylase kinase, delta); calmodulin 2 (phosphorylase kinase, delta); calmodulin 1 (phosphorylase kinase, delta)</a>                                                                                                                                   | RG            | <a href="#">Homo sapiens</a> |
| ILMN_2362681               | <a href="#">carboxylesterase 2 (intestine, liver)</a>                                                                                                                                                                                                                                | RG            | <a href="#">Homo sapiens</a> |
| ILMN_2362974               | <a href="#">caspase 7, apoptosis-related cysteine peptidase</a>                                                                                                                                                                                                                      | RG            | <a href="#">Homo sapiens</a> |
| ILMN_2256765               | <a href="#">cell division cycle 16 homolog (S. cerevisiae)</a>                                                                                                                                                                                                                       | RG            | <a href="#">Homo sapiens</a> |
| ILMN_1692390               | <a href="#">cyclin T1</a>                                                                                                                                                                                                                                                            | RG            | <a href="#">Homo sapiens</a> |
| ILMN_2313074               | <a href="#">death effector domain containing</a>                                                                                                                                                                                                                                     | RG            | <a href="#">Homo sapiens</a> |
| ILMN_1660663, ILMN_1664560 | <a href="#">dual-specificity tyrosine-(Y)-phosphorylation regulated kinase 1A</a>                                                                                                                                                                                                    | RG            | <a href="#">Homo sapiens</a> |
| ILMN_2312719               | <a href="#">exosome component 9</a>                                                                                                                                                                                                                                                  | RG            | <a href="#">Homo sapiens</a> |
| ILMN_2188374               | <a href="#">exportin, tRNA (nuclear export receptor for tRNAs); similar to Exportin-T (tRNA exportin) (Exportin(tRNA))</a>                                                                                                                                                           | RG            | <a href="#">Homo sapiens</a> |
| ILMN_1761113               | <a href="#">guanine nucleotide binding protein-like 2 (nucleolar)</a>                                                                                                                                                                                                                | RG            | <a href="#">Homo sapiens</a> |
| ILMN_2324056               | <a href="#">guanine nucleotide binding protein-like 3 (nucleolar)</a>                                                                                                                                                                                                                | RG            | <a href="#">Homo sapiens</a> |
| ILMN_2220283               | <a href="#">heterogeneous nuclear ribonucleoprotein A1-like 3; similar to heterogeneous nuclear ribonucleoprotein A1; heterogeneous nuclear ribonucleoprotein A1 pseudogene 2; heterogeneous nuclear ribonucleoprotein A1; heterogeneous nuclear ribonucleoprotein A1 pseudogene</a> | RG            | <a href="#">Homo sapiens</a> |
| ILMN_2231242               | <a href="#">high-mobility group box 1; high-mobility group box 1-like 10</a>                                                                                                                                                                                                         | RG            | <a href="#">Homo sapiens</a> |
| ILMN_1772455               | <a href="#">histone deacetylase 3</a>                                                                                                                                                                                                                                                | RG            | <a href="#">Homo sapiens</a> |
| ILMN_1728521               | <a href="#">histone deacetylase 7</a>                                                                                                                                                                                                                                                | RG            | <a href="#">Homo sapiens</a> |
| ILMN_2317463               | <a href="#">integrator complex subunit 1</a>                                                                                                                                                                                                                                         | RG            | <a href="#">Homo sapiens</a> |
| ILMN_1679483               | <a href="#">integrator complex subunit 10</a>                                                                                                                                                                                                                                        | RG            | <a href="#">Homo sapiens</a> |
| ILMN_1725169               | <a href="#">integrator complex subunit 12</a>                                                                                                                                                                                                                                        | RG            | <a href="#">Homo sapiens</a> |
| ILMN_1794260               | <a href="#">lysine (K)-specific demethylase 2B</a>                                                                                                                                                                                                                                   | RG            | <a href="#">Homo sapiens</a> |
| ILMN_1706539               | <a href="#">lysine (K)-specific demethylase 3B</a>                                                                                                                                                                                                                                   | RG            | <a href="#">Homo sapiens</a> |
| ILMN_2389347               | <a href="#">nuclear receptor subfamily 3, group C, member 1 (glucocorticoid receptor)</a>                                                                                                                                                                                            | RG            | <a href="#">Homo sapiens</a> |
| ILMN_1771835               | <a href="#">nucleoporin 54kDa</a>                                                                                                                                                                                                                                                    | RG            | <a href="#">Homo sapiens</a> |
| ILMN_1710844               | <a href="#">poly (ADP-ribose) polymerase family, member 10</a>                                                                                                                                                                                                                       | RG            | <a href="#">Homo sapiens</a> |
| ILMN_1659411               | <a href="#">polymerase (RNA) II (DNA directed) polypeptide C, 33kDa</a>                                                                                                                                                                                                              | RG            | <a href="#">Homo sapiens</a> |
| ILMN_1719303               | <a href="#">prolyl 4-hydroxylase, beta polypeptide</a>                                                                                                                                                                                                                               | RG            | <a href="#">Homo sapiens</a> |
| ILMN_1668778               | <a href="#">protein kinase, AMP-activated, alpha 2 catalytic subunit</a>                                                                                                                                                                                                             | RG            | <a href="#">Homo sapiens</a> |
| ILMN_1701855               | <a href="#">protein phosphatase 1, catalytic subunit, gamma isoform</a>                                                                                                                                                                                                              | RG            | <a href="#">Homo sapiens</a> |
| ILMN_1761175               | <a href="#">ribosomal protein S6 kinase, 70kDa, polypeptide 2</a>                                                                                                                                                                                                                    | RG            | <a href="#">Homo sapiens</a> |

| ILLUMINA_ID  | GENE NAME                                                                                                  | Related Genes      | Species                      |
|--------------|------------------------------------------------------------------------------------------------------------|--------------------|------------------------------|
| ILMN_2375386 | <a href="#">similar to ribonucleic acid binding protein S1; RNA binding protein S1, serine-rich domain</a> | <a href="#">RG</a> | <a href="#">Homo sapiens</a> |
| ILMN_2175075 | <a href="#">splicing factor, arginine/serine-rich 4</a>                                                    | <a href="#">RG</a> | <a href="#">Homo sapiens</a> |
| ILMN_1660368 | <a href="#">transformation/transcription domain-associated protein</a>                                     | <a href="#">RG</a> | <a href="#">Homo sapiens</a> |
| ILMN_1705266 | <a href="#">v-rel reticuloendotheliosis viral oncogene homolog A (avian)</a>                               | <a href="#">RG</a> | <a href="#">Homo sapiens</a> |
| ILMN_1661636 | <a href="#">zinc finger, MYM-type 2</a>                                                                    | <a href="#">RG</a> | <a href="#">Homo sapiens</a> |

Please cite [Nature Protocols 2009; 4\(1\):44](#) & [Genome Biology 2003; 4\(5\):P3](#) within any publication that makes use of any methods inspired by DAVID.

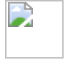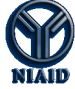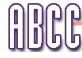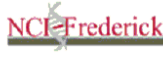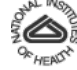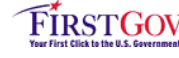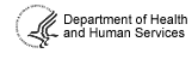

[Term of Service](#) | [Contact Us](#) | [Site Map](#)

|   |                                                                                                                                                          |
|---|----------------------------------------------------------------------------------------------------------------------------------------------------------|
| ■ | TIMP metalloproteinase inhibitor 1                                                                                                                       |
| ■ | DEAH (Asp-Glu-Ala-His) box polypeptide 30                                                                                                                |
| ■ | carboxylesterase 2 (intestine, liver)                                                                                                                    |
| ■ | prolyl 4-hydroxylase, beta polypeptide                                                                                                                   |
| ■ | SIL1 homolog, endoplasmic reticulum chaperone ( <i>S. cerevisiae</i> )                                                                                   |
| ■ | RAD51 homolog (RecA homolog, <i>E. coli</i> ) ( <i>S. cerevisiae</i> )                                                                                   |
| ■ | MRE11 meiotic recombination 11 homolog A ( <i>S. cerevisiae</i> )                                                                                        |
| ■ | C-terminal binding protein 1                                                                                                                             |
| ■ | IKAROS family zinc finger 5 (Pegasus)                                                                                                                    |
| ■ | guanine nucleotide binding protein-like 2 (nucleolar)                                                                                                    |
| ■ | transformation/transcription domain-associated protein                                                                                                   |
| ■ | nuclear receptor subfamily 3, group C, member 1 (glucocorticoid receptor)                                                                                |
| ■ | YY1 transcription factor                                                                                                                                 |
| ■ | histone deacetylase 3                                                                                                                                    |
| ■ | protein phosphatase 1, catalytic subunit, gamma isoform                                                                                                  |
| ■ | exportin, tRNA (nuclear export receptor for tRNAs); similar to Exportin-T (tRNA exportin) (Exportin(tRNA))                                               |
| ■ | nucleoporin 54kDa                                                                                                                                        |
| ■ | lysine (K)-specific demethylase 3B                                                                                                                       |
| ■ | DEAD (Asp-Glu-Ala-Asp) box polypeptide 21                                                                                                                |
| ■ | AT rich interactive domain 1A (SWI-like)                                                                                                                 |
| ■ | caspase 7, apoptosis-related cysteine peptidase                                                                                                          |
| ■ | SON DNA binding protein                                                                                                                                  |
| ■ | polymerase (RNA) II (DNA directed) polypeptide C, 33kDa                                                                                                  |
| ■ | high-mobility group box 1; high-mobility group box 1-like 10                                                                                             |
| ■ | v-rel reticuloendotheliosis viral oncogene homolog A (avian)                                                                                             |
| ■ | histone deacetylase 7                                                                                                                                    |
| ■ | integrator complex subunit 12                                                                                                                            |
| ■ | E2F transcription factor 4, p107/p130-binding                                                                                                            |
| ■ | splicing factor, arginine/serine-rich 4                                                                                                                  |
| ■ | integrator complex subunit 10                                                                                                                            |
| ■ | ribosomal protein S6 kinase, 70kDa, polypeptide 2                                                                                                        |
| ■ | cyclin T1                                                                                                                                                |
| ■ | calmodulin 3 (phosphorylase kinase, delta); calmodulin 2 (phosphorylase kinase, delta); calmodulin 1 (phosphorylase kinase, delta)                       |
| ■ | A kinase (PRKA) anchor protein 8                                                                                                                         |
| ■ | adenosine deaminase, RNA-specific, B1 (RED1 homolog rat)                                                                                                 |
| ■ | TERF1 (TRF1)-interacting nuclear factor 2                                                                                                                |
| ■ | EBNA1 binding protein 2                                                                                                                                  |
| ■ | exosome component 9                                                                                                                                      |
| ■ | cell division cycle 16 homolog ( <i>S. cerevisiae</i> )                                                                                                  |
| ■ | UTP11-like, U3 small nucleolar ribonucleoprotein, (yeast)                                                                                                |
| ■ | similar to ribonucleic acid binding protein S1; RNA binding protein S1, serine-rich domain                                                               |
| ■ | YTH domain containing 1                                                                                                                                  |
| ■ | TAF4 RNA polymerase II, TATA box binding protein (TBP)-associated factor, 135kDa                                                                         |
| ■ | heterogeneous nuclear ribonucleoprotein A1-like 3; similar to heterogeneous nuclear ribonucleoprotein A1; heterogeneous nuclear ribonucleoprotein A1 pse |
| ■ | integrator complex subunit 1                                                                                                                             |
| ■ | poly (ADP-ribose) polymerase family, member 10                                                                                                           |
| ■ | DAZ associated protein 1                                                                                                                                 |
| ■ | X-ray repair complementing defective repair in Chinese hamster cells 5 (double-strand-break rejoining)                                                   |
| ■ | MYC induced nuclear antigen                                                                                                                              |
| ■ | lysine (K)-specific demethylase 2B                                                                                                                       |
| ■ | dual-specificity tyrosine-(Y)-phosphorylation regulated kinase 1A                                                                                        |
| ■ | death effector domain containing                                                                                                                         |
| ■ | guanine nucleotide binding protein-like 3 (nucleolar)                                                                                                    |
| ■ | zinc finger, MYM-type 2                                                                                                                                  |
| ■ | protein kinase, AMP-activated, alpha 2 catalytic subunit                                                                                                 |
| ■ | SH3-domain GRB2-like endophilin B2                                                                                                                       |

GO:0031981-nuclear lumen  
 GO:0070013-intracellular organelle lumen  
 GO:0043233-organelle lumen  
 GO:0031974-membrane-enclosed lumen
